# Supplementary material
Source: publisher figshare collection journal article supplement (https://gsapubs.figshare.com/ndownloader/files/23313176)

**Figure S1:** Total FeO (FeO<sub>T</sub>)/MgO vs SiO<sub>2</sub> plot (Miyashiro, 1974) showing that the majority of samples from the three plutons are classified as calc-alkaline. Symbols as described in Fig. 3.

**Figure S2:** Total alkali vs silica (TAS) plot (Cox et al., 1979). Symbols as described in Fig. 3.

**Figure S3:** Al/CNK (Al<sub>2</sub>O<sub>3</sub>/(CaO + Na<sub>2</sub>O + K<sub>2</sub>O)) vs Al/NK (Al<sub>2</sub>O<sub>3</sub>/(Na<sub>2</sub>O + K<sub>2</sub>O)) plot (Shand, 1943). Symbols as described in Fig. 3.

**Figure S4:** La/Yb<sub>N</sub> vs SiO<sub>2</sub> (wt. %). Symbols as described in Fig. 3.

**Figure S5:** Gd/Yb<sub>N</sub> vs SiO<sub>2</sub> (wt. %). Symbols as described in Fig. 3.

**Figure S6:** High-precision CA-ID-TIMS U-Pb zircon age (Ma) vs. zircon ε<sub>Hf</sub> from samples from the Black Peak intrusive complex. Lighter symbols represent ε<sub>Hf</sub> for a single spot on a zircon, darker symbols with a black border represent the average ε<sub>Hf</sub> for each sample. Zircon geochronology from Shea et al. (2016). Typical uncertainty of sample ages is less than 100 ka.

**Figure S7:** Sr/Y vs Y diagram. Continuous black line delimits the field of adakite-like rocks from Defant and Drummond (1990).

#### References:

- Cox K., Bell J.D., Pankhurst R.J., 1979, The interpretation of igneous rocks: London, Allen and Unwin, 450 p.
- Defant, M.J., Drummon, M.S., 1990, Derivation of some modern arc magmas by melting of young subducted lithosphere: *Nature*, v. 347, p. 662-665.
- Miyashiro, A., 1974, Volcanic rock series in island arcs and active continental margins: *American Journal of Science*, v. 274, p. 321–355.
- Shand, S.J., 1943, Eruptive rocks: Their Genesis, Composition, Classification and their Relations to Ore-deposits: New York, Wiley, 444 p.
- Shea, E.K., Miller, J.S., Miller, R.B., Bowring, S.A., Sullivan, K.M., 2016, Growth and maturation of a mid- to shallow-crustal intrusive complex, North Cascades, WA: *Geosphere*, v. 12, p. 1489-1516, doi: 10.1130/GES01290.1.

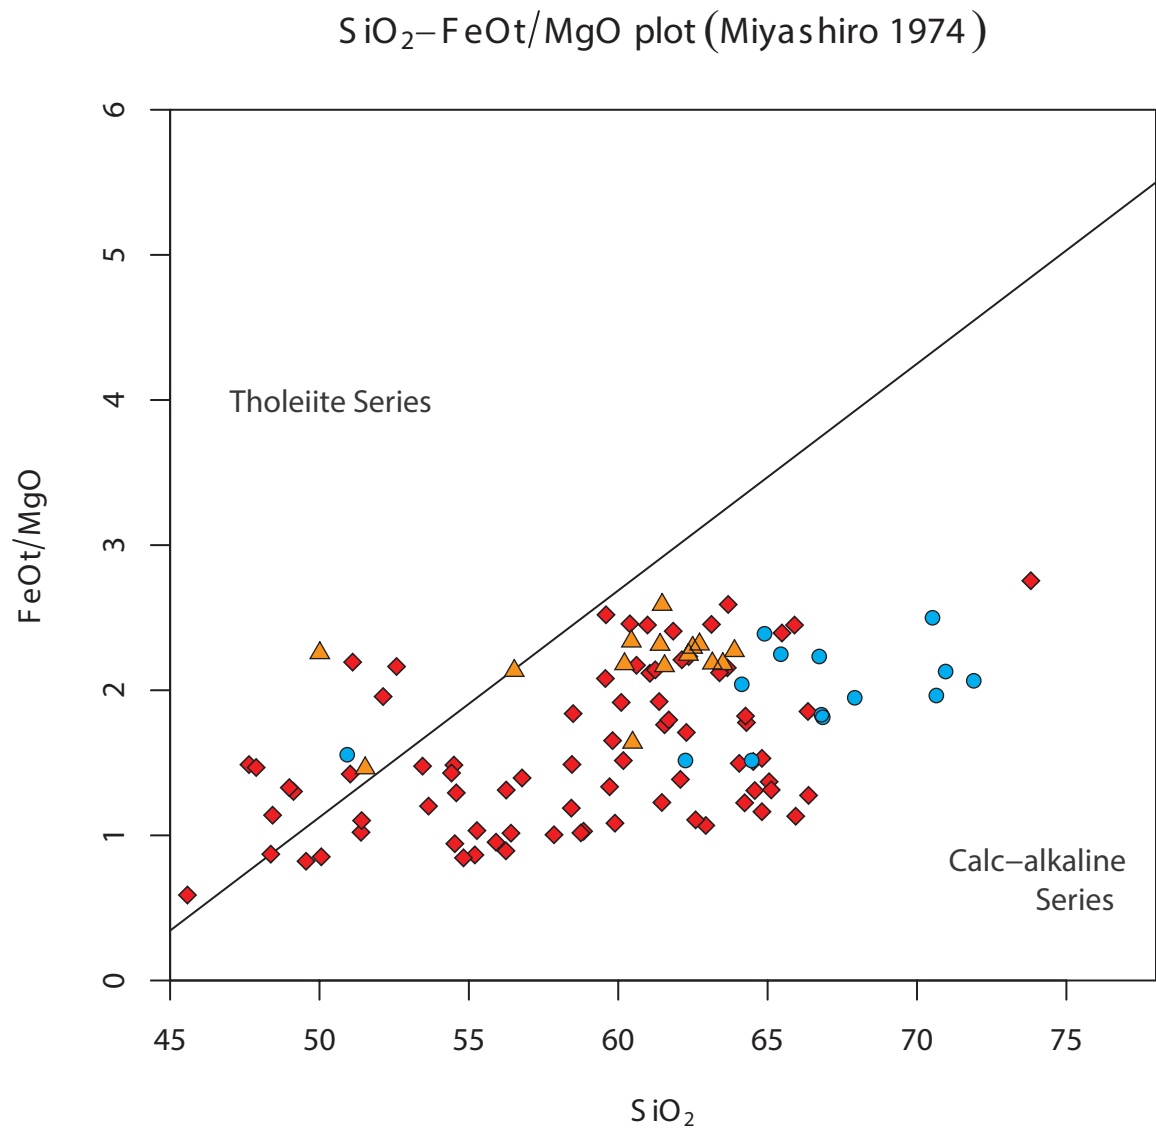

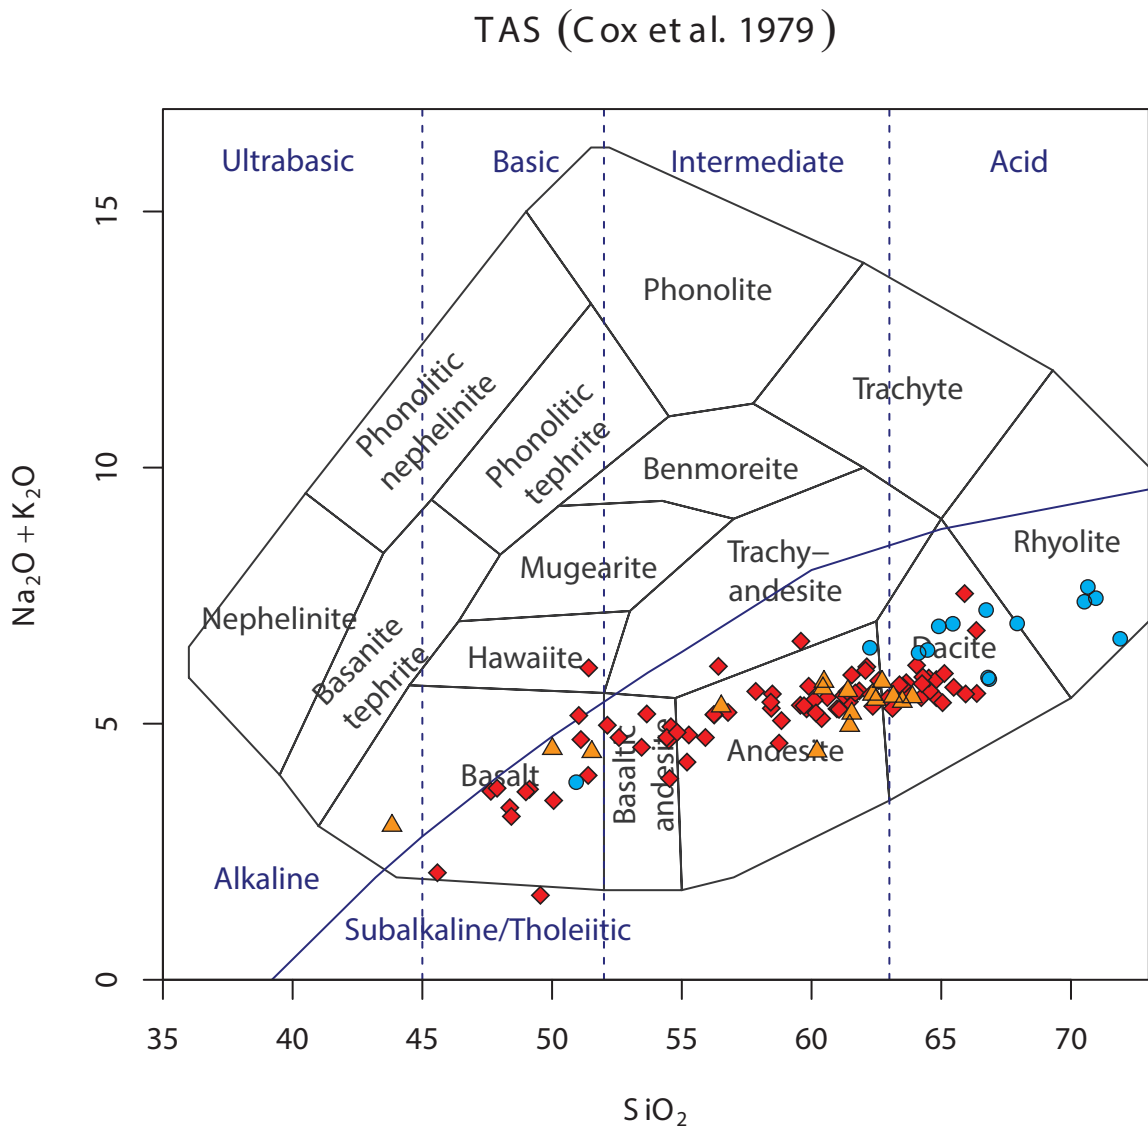

A/CNK – A/NK plot (S hand 1943)

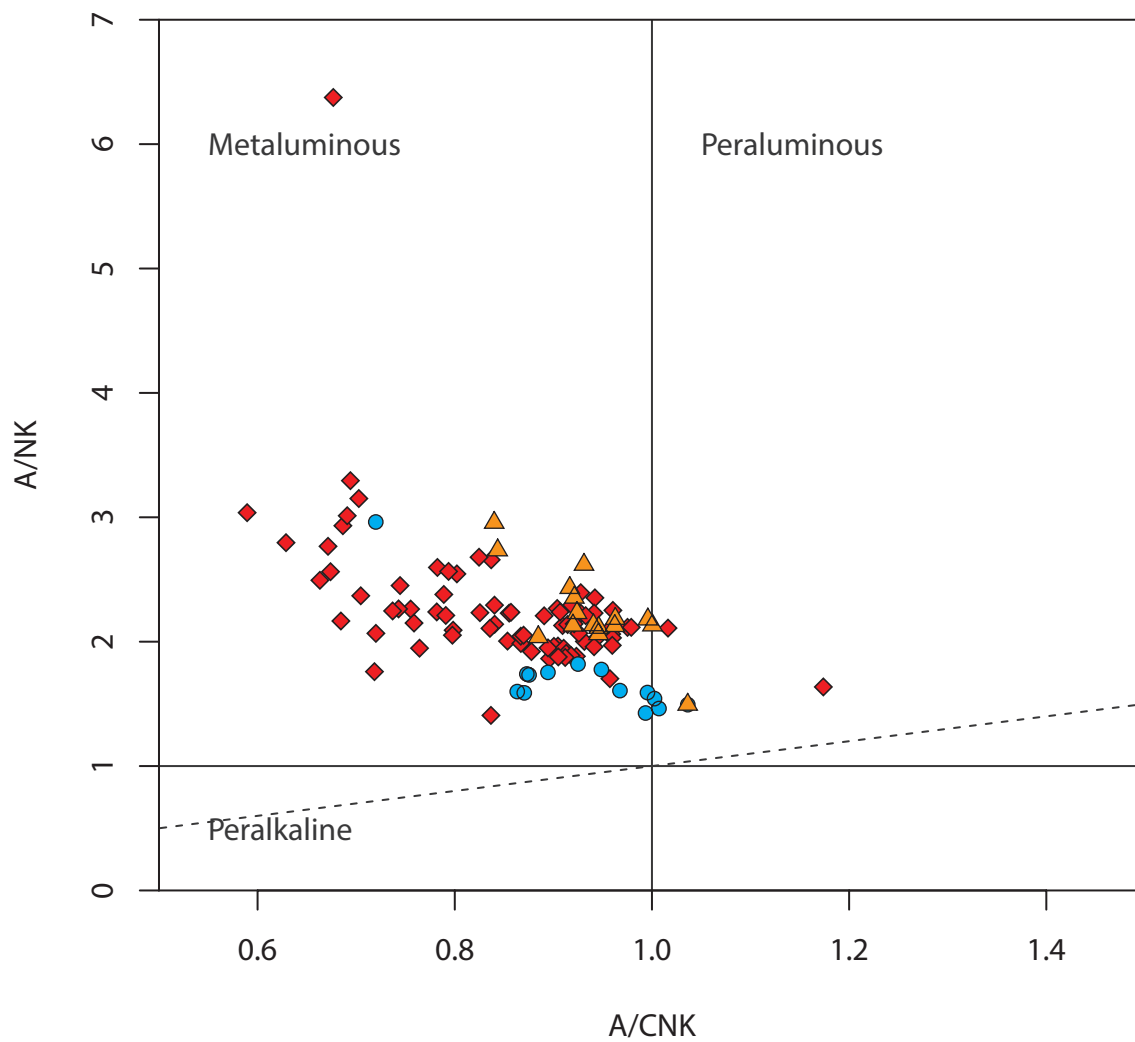

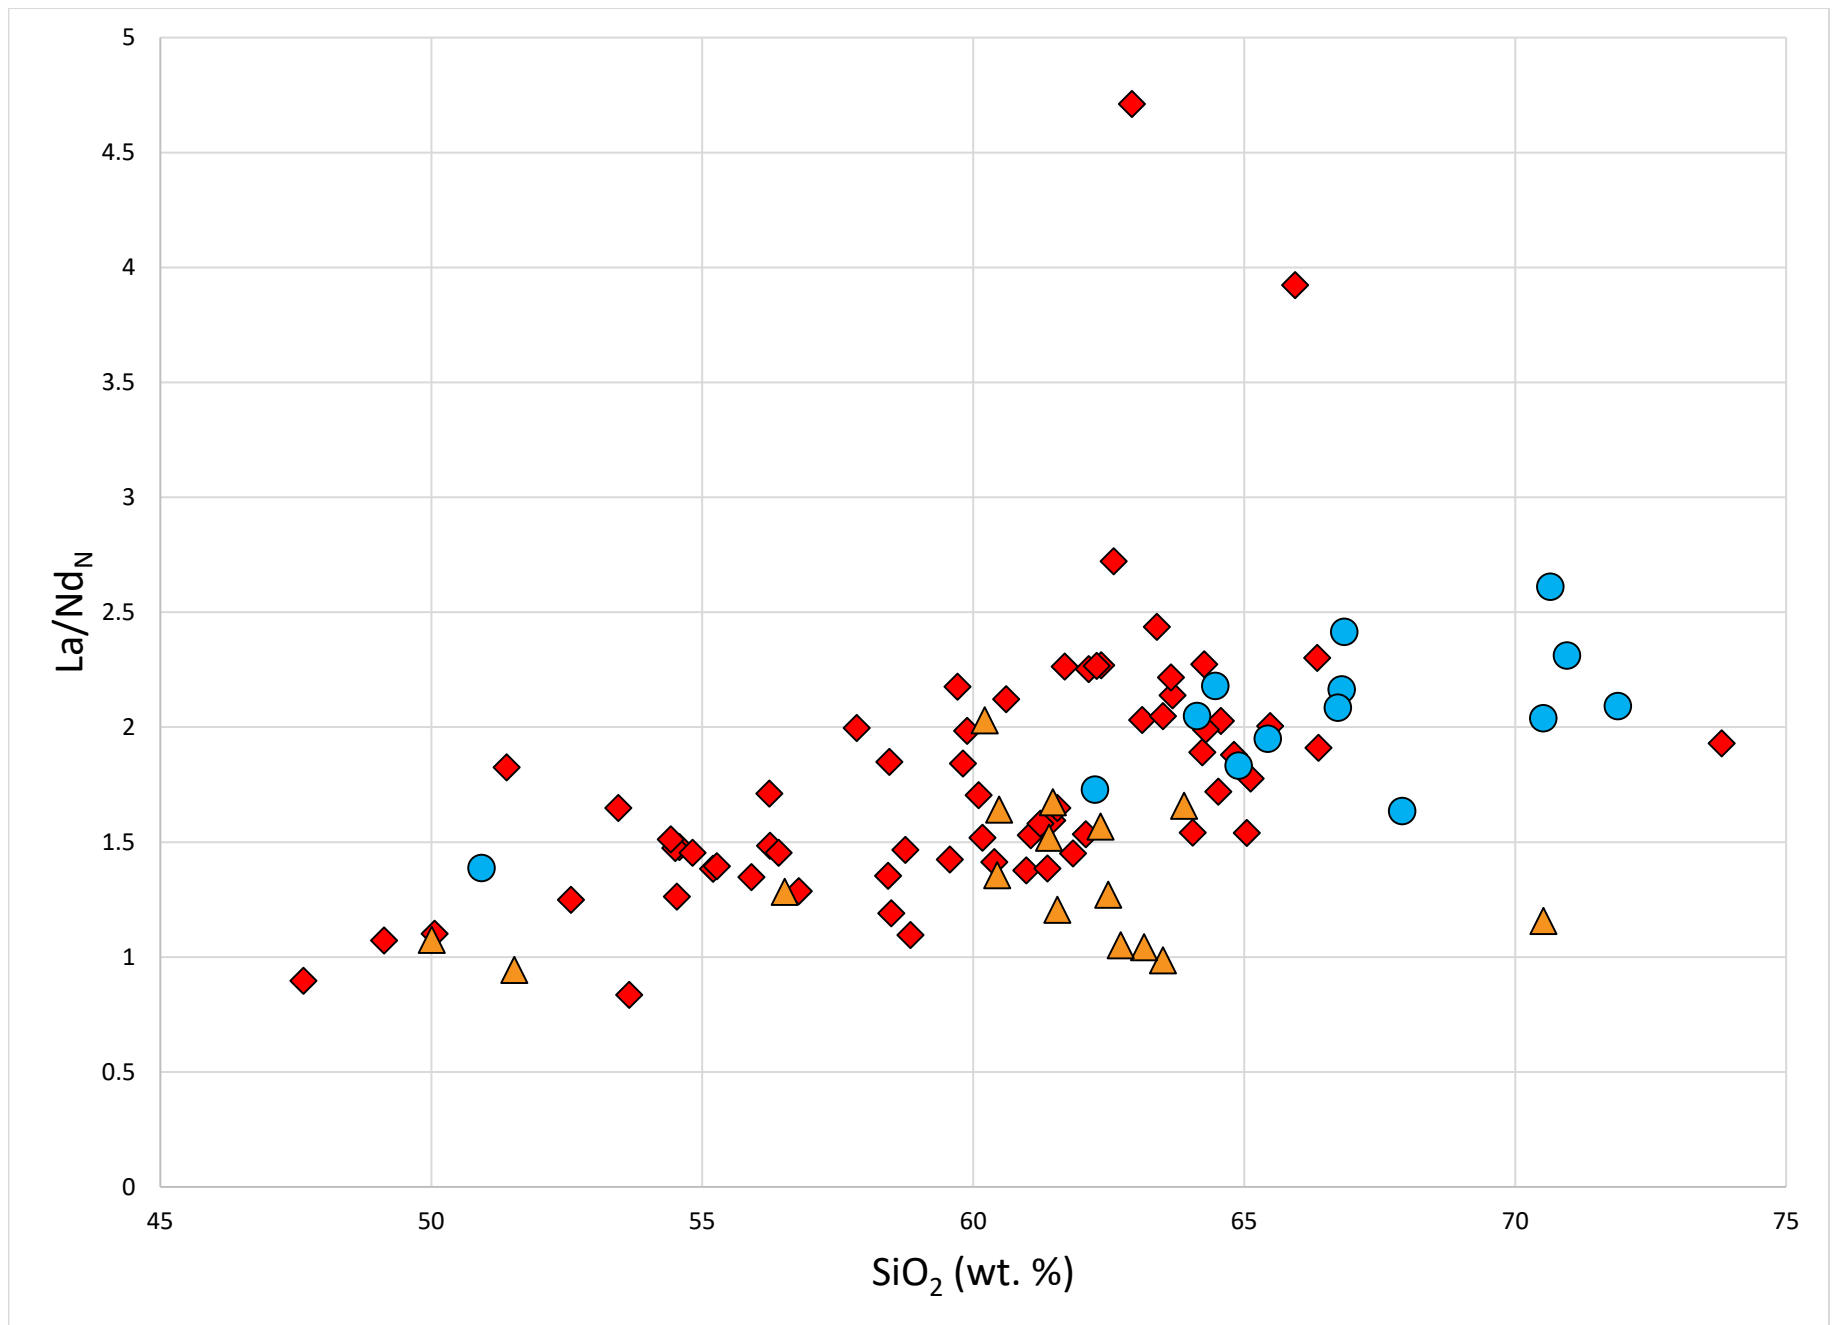

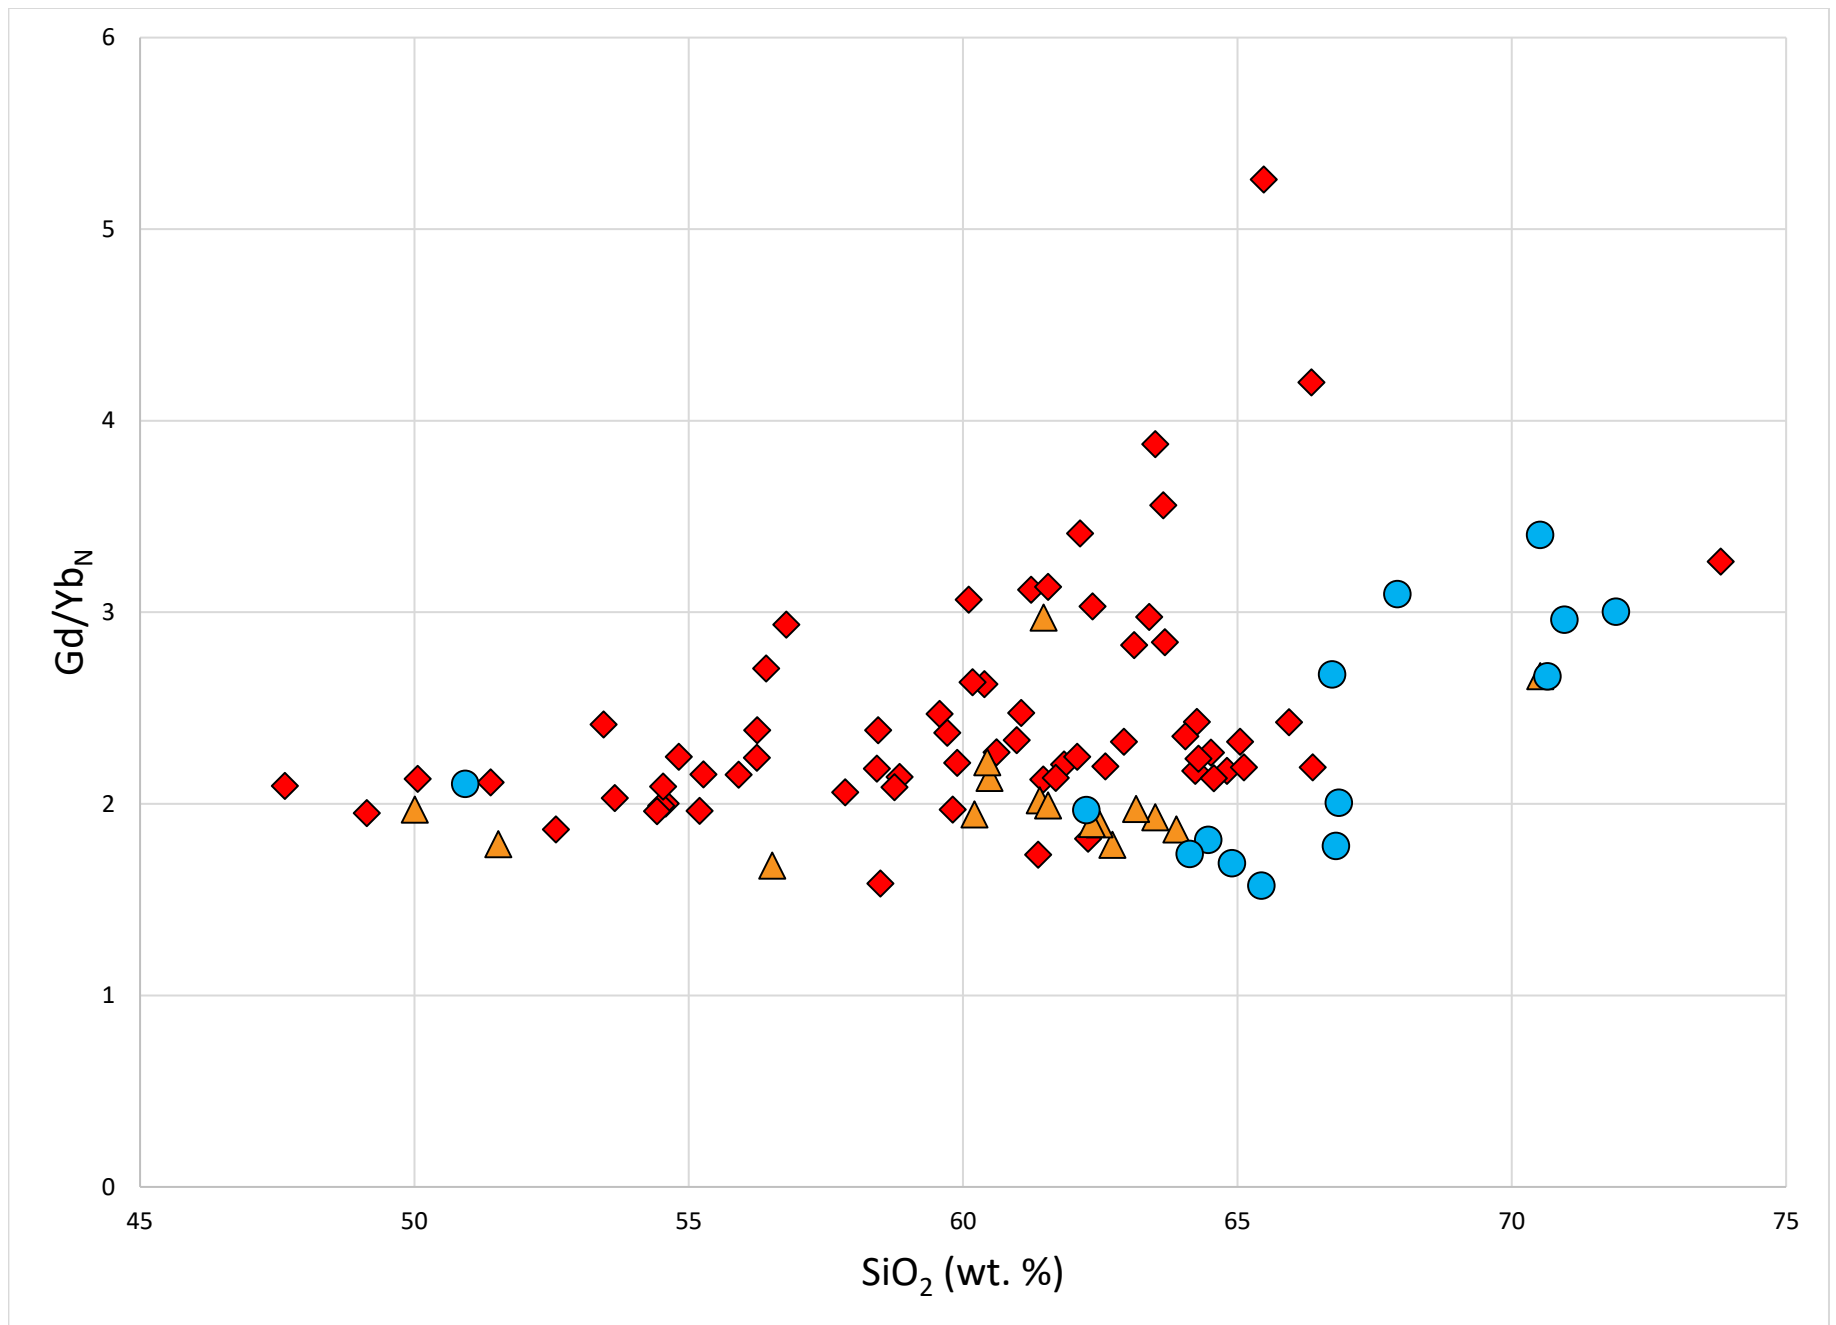

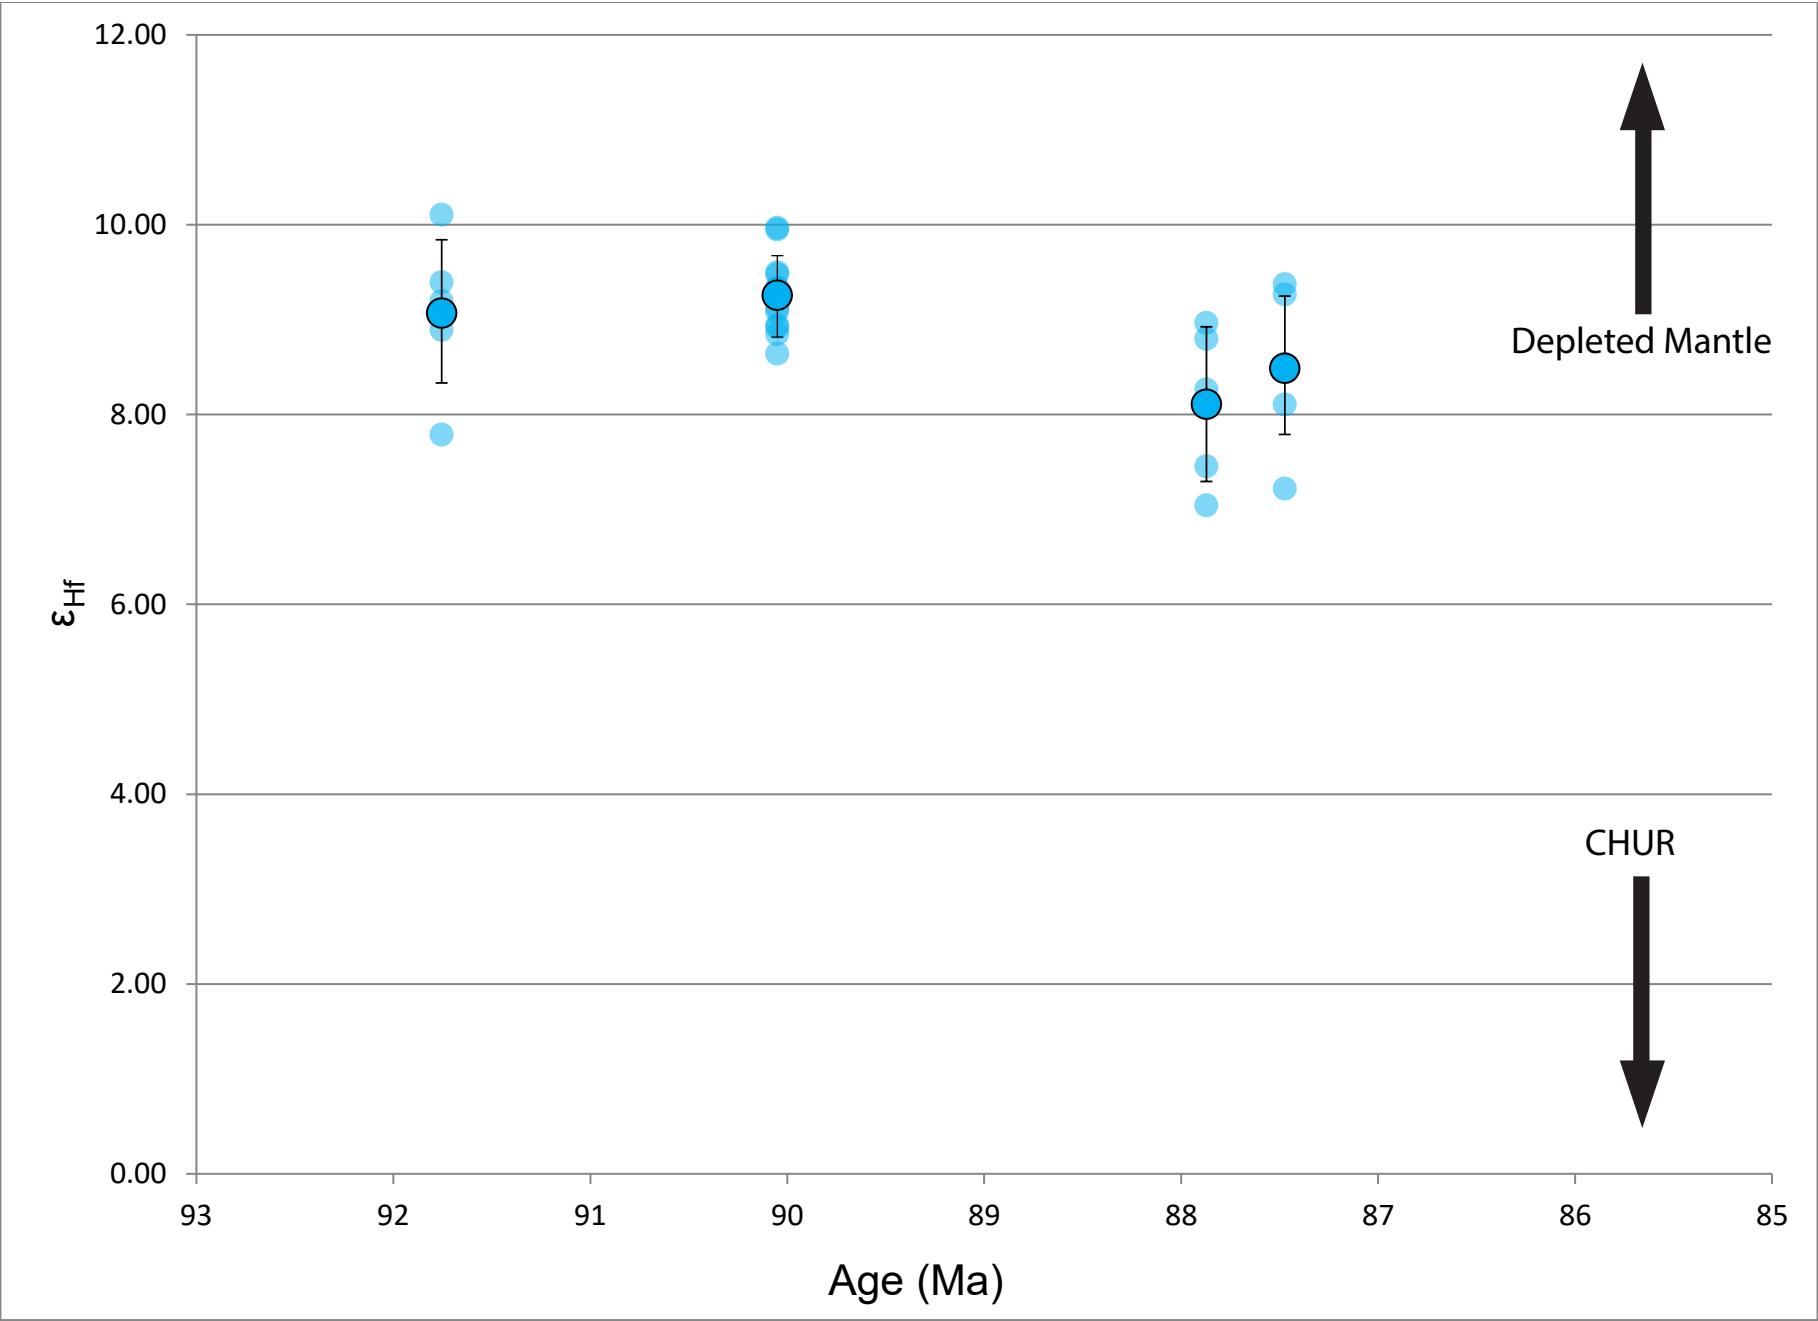

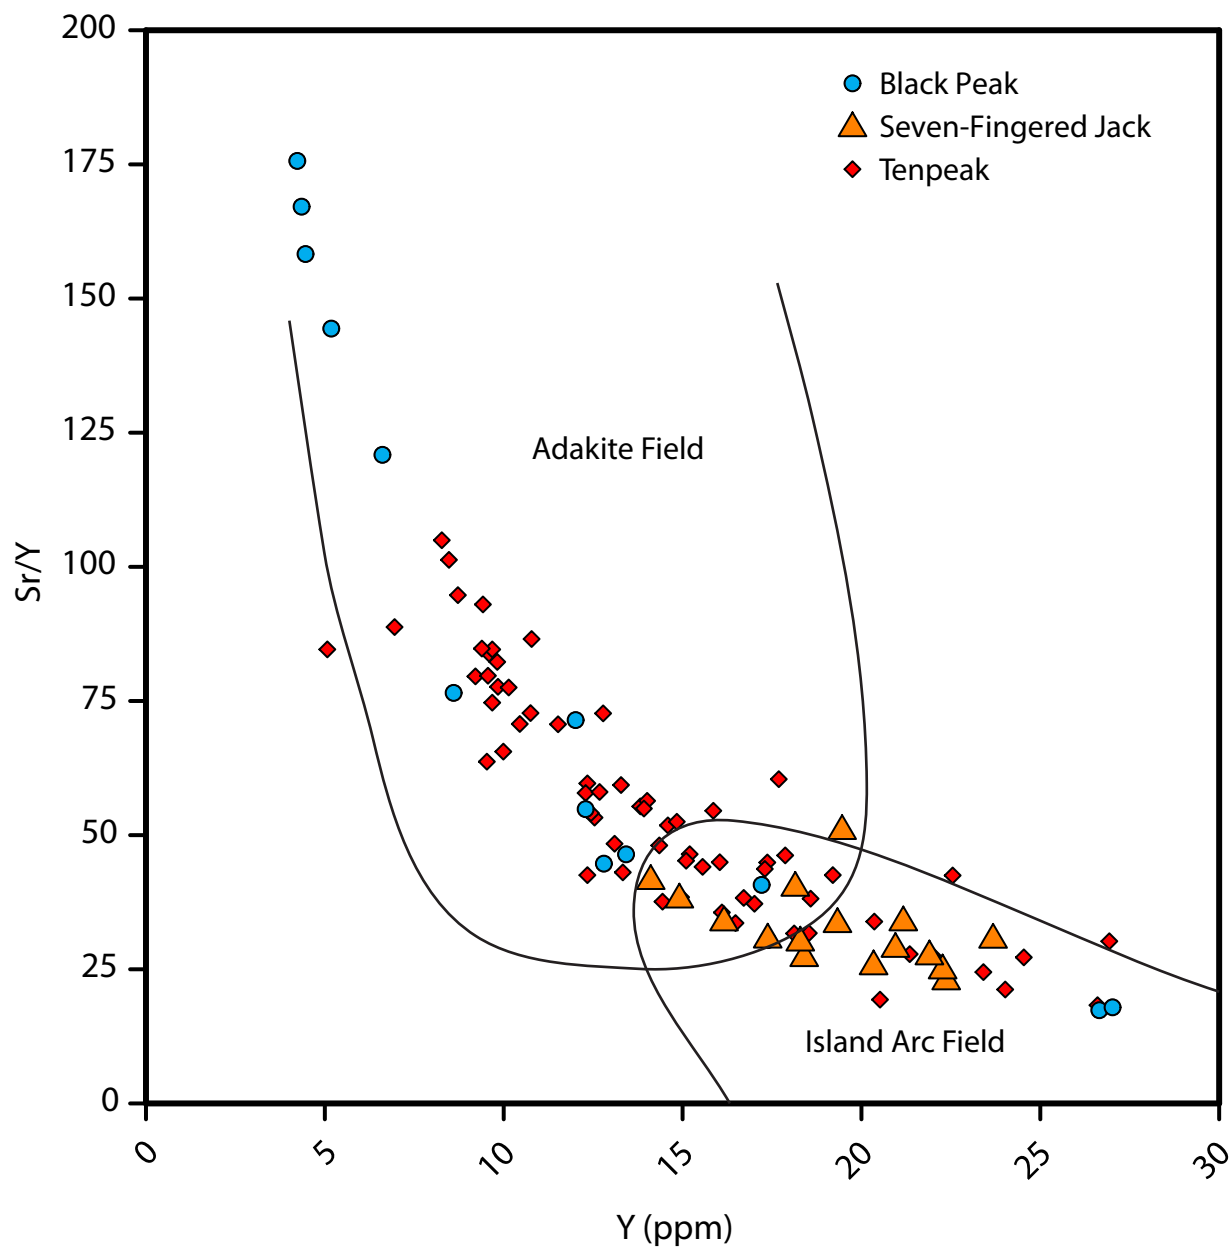

Supplement: Supplementary file 1 [file 23313176 › 2018356.pdf]
