# Supplementary material
Source: publisher figshare collection journal article supplement (https://gsapubs.figshare.com/ndownloader/files/23313176)
Supplement: Supplementary file 1 [file 23313176]

Archive with 2 entries (2 files):
- 2018356_DataTables.xlsx
- 2018356.pdf
