# Supplementary material
Source: publisher figshare collection journal article supplement (https://gsapubs.figshare.com/ndownloader/files/23313176)
Supplement: Supplementary file 1 [file 23313176 › 2018356_DataTables.xlsx]

## Sheet: Sample Locations
Shea, E.K., Miller, J.S., Miller, R.B., Chan, C.F., Kent, A.J.R., Hanchar, J.M., Dustin, K., and Elkins, S., 2018, Time scale for the development of thickened crust in the Cretaceous North Cascades magmatic arc, Washington, and relationship to Cretaceous flare-up magmatism: Lithosphere, https://doi.org/10.1130/L1001.1.
GSA Data Repository Item 2018356
Black Peak Intrusive Complex
	Samples from Shea et al. (2016)
	Universal Transverse Mercator Coordinates WGS 84, zone 10
	Sample Number	Easting	Northing
	MAF	680205	5.36687e+06
	PX10-54	680371	5.36599e+06
	PX10-76	677954	5.37304e+06
	PX10-76	677954	5.37304e+06
	K16B	675821	5.37056e+06
	PX10-251	669639	5.37461e+06
	PX10-86	664527	5.37037e+06
	PX11-261A	679217	5.3631e+06
	PX10-96	668963	5.37074e+06
	PX10-103A	671743	5.36466e+06
	PX10-103B	671743	5.36466e+06
	PX10-175	679049	5356355
	Samples from Chan (2012)
	Universal Transverse Mercator Coordinates CONUS NAD 27, zone 10
	Sample Number	Easting	Northing
	AKCP-7	674268	5365257
	AKCP-23	678673	5369572
	PX-100-1	669645	5374389
Seven-Fingered Jack Pluton
	Samples from Elkins (2016)
	Universal Transverse Mercator Coordinates NAD 83, zone 10
	Sample Number	Easting	Northing
	SFJ-2A	669622	5324396
	SFJ-2C	669622	5324396
	SFJ-85a	668224	5324277
	SFJ-85b	668224	5324277
	SFJ-96	669831	5321137
	SFJ-124	670414	5321248
	SFJ-162	671913	5319492
	SFJ-174	670934	5319611
	Samples from Dustin (2015)
	Universal Transverse Mercator Coordinates NAD 83, zone 10
	Sample Number	Easting	Northing
	BPX-137-1	674096	5316887
	BPX-145-A	677044	5314252
	BPX-154-A	676240	5313064
	KD-13	678538	5313668
	KD-53	674444	5314738
	KD-59	673114	5318092
	Samples from Shea (2014)
	Universal Transverse Mercator Coordinates WGS 84, zone 10
	Sample Number	Easting	Northing
	PX12-400	682590	5.30516e+06
	PX12-432C	679258	5306838
Tenpeak Pluton
	Samples from Miller et al. (2018)
	Sample Number	Latitude	Longitude
	97TP91	47.9914	-121.012
	97TP87C	47.9878	-121.021
	97TP97	47.9934	-120.956
	97TP93B	47.9915	-121.006
	97TP-94	47.9927	-120.989
	95TP11	48.019	-120.984
	96TP-52	47.9885	-120.965
	99TP-151	48.047	-121.049
	99TP-153a	48.0416	-121.016
	99TP-153b	48.0416	-121.016
	99TP-154a	48.0436	-121.021
	99TP-155a	48.0401	-121.03
	99TP-155b	48.0401	-121.03
	99TP-156a	48.042	-121.035
	99TP-157b	48.0445	-121.042
	99TP-163	48.0599	-121.056
	99TP-165	48.0418	-121.007
	TPM-145	48.0488	-121.005
	98TP-102c	47.9318	-120.855
	98TP-124d/TP-313d	47.9314	-120.858
	98TP-127/TP-356	47.932	-120.883
	97TP-79B	48.0296	-120.896
	97TP-80	48.0296	-120.896
	98TP-130/TP-320-1	48.1464	-121.141
	98TP-133	48.1543	-121.118
	95TP-10B	48.0261	-120.975
	95TP-6	48.0251	-120.975
	95TP-8	48.0258	-120.975
	95TP-7	48.0252	-120.975
	95TP-5	48.0212	-120.933
	95TP-85	48.0239	-120.895
	98TP-128/TP-233-2b	48.0332	-120.891
	95TP-1	48.017	-120.944
	98TP-167	48.0547	-121.002
	96TP-29	47.9555	-120.848
	96TP-42A	47.9703	-120.853
	96TP-21a	47.9661	-120.837
	96TP-21b	47.9661	-120.837
	96TP-26	47.9579	-120.836
	95TP-13	47.9518	-120.941
	TPM-10B	not available
	96TP64A	47.9598	-120.937
	96TP63A	47.9589	-120.938
	96TP63B	47.9589	-120.938
	96TP63C	47.9589	-120.938
	96TP64B2	47.9598	-120.937
	Samples from Chan et al. (2017)
	Universal Transverse Mercator Coordinates CONUS NAD 27, zone 10
	Sample Number	Easting	Northing
	AKCP-1	653862	5313801
	AKCP-112A-M	653962	5313593
	AKCP-115B	654010	5313629
	AKCP-119	654123	5313723
	AKCP-121-A	654156	5313762
	CCE4A	653981	5313610
	AKCP-17B	653865	5313802
	AKCP-2	653862	5313801
	AKCP-17	653865	5313802
	AKCP-112A-F	653962	5313593
	AKCP-113	653973	5313603
	AKCP-115A	654010	5313629
	AKCP-118	654081	5313684
	AKCP-122	654221	5313829
	AKCP-123	654278	5313844
	AKCP-124	654296	5313946
	AKCP-111	653948	5313581
	AKCP-4	653428	5314142
	AKCP-121-IC	650407	5317271

## Sheet: XRF
	TENPEAK PLUTON
Unit	SC	SC	SC	SC	SC	SC	SC	SC	SC	SC	SC	SC	SC	SC	SC	SC	SC	SC	IC	IC	IC	IC	IC	IC	IC	IC	IC	IC	IC	IC	IC	IC	IC	IC	IC	IC	IC	IC-Un-named unit	IC-Un-named unit	IC-Un-named unit	IC-White Mountain Lobe	IC-White Mountain Lobe	IC-Northern Mafic Tonalite	IC-Northern Mafic Tonalite	IC-Interlayered Unit	IC-Interlayered Unit	IC-Interlayered Unit	MC	MC
Sample	AKCP-1	CCE4A	AKCP-112AM	AKCP-115AM	AKCP-119	AKCP-121A	AKCP-17	AKCP-17B	AKCP-2	AKCP-112AF	AKCP-113	AKCP-115AF	AKCP-118	AKCP-122	AKCP-123	AKCP-124	AKCP-111	AKCP-4	AKCP-121-IC	97TP91	97TP87C	97TP97	97TP93B	97TP-94	95TP11	96TP-52	99TP-151	99TP-153a	99TP-153b	99TP-154a	99TP-155a	99TP-155b	99TP-156a	99TP-157b	99TP-163	99TP-165	TPM-145	98TP-102c	98TP-124d/TP-313d	98TP-127/TP-356	97TP-79B	97TP-80	98TP-130/TP-320-1	98TP-133	95TP-10B	95TP-6	95TP-8	TL-6	TP-12c
Reference	Chan et al. (2017)	Chan et al. (2017)	Chan et al. (2017)	Chan et al. (2017)	Chan et al. (2017)	Chan et al. (2017)	Chan et al. (2017)	Chan et al. (2017)	Chan et al. (2017)	Chan et al. (2017)	Chan et al. (2017)	Chan et al. (2017)	Chan et al. (2017)	Chan et al. (2017)	Chan et al. (2017)	Chan et al. (2017)	Chan et al. (2017)	Chan et al. (2017)	Chan et al. (2017)	Miller et al. (2018)	Miller et al. (2018)	Miller et al. (2018)	Miller et al. (2018)	Miller et al. (2018)	Miller et al. (2018)	Miller et al. (2018)	Miller et al. (2018)	Miller et al. (2018)	Miller et al. (2018)	Miller et al. (2018)	Miller et al. (2018)	Miller et al. (2018)	Miller et al. (2018)	Miller et al. (2018)	Miller et al. (2018)	Miller et al. (2018)	Miller et al. (2018)	Miller et al. (2018)	Miller et al. (2018)	Miller et al. (2018)	Miller et al. (2018)	Miller et al. (2018)	Miller et al. (2018)	Miller et al. (2018)	Miller et al. (2018)	Miller et al. (2018)	Miller et al. (2018)	Miller et al. (2018)	Miller et al. (2018)
SiO2	50.0576	55.1968	51.3922	55.9074	55.2745	49.1323	59.8903	62.9296	66.3697	58.843	64.2276	58.7492	64.8127	61.4588	65.0503	64.5734	53.6529	47.641	63.6789	59.84	60.49	62.47	73.2	63.53	62.72	60.42	60.86	59.47	58.29	56.64	63.29	65.18	62.04	63.56	54.41	61.19	61.25	54.35	54.11	60.94	52.5	59.07	60.84	58.25	59.95	52.65	54.37	44.86	47.41
TiO2	1.14499	0.893334	1.13226	0.898332	0.984927	1.43899	0.760924	0.574301	0.474543	0.636707	0.583914	0.826624	0.561469	0.652725	0.572635	0.587098	0.913741	1.53529	0.700672	0.853	0.788	0.744	0.213	0.669	0.77	0.812	0.796	0.901	0.882	0.912	0.696	0.537	0.679	0.648	1.067	0.773	0.724	1.049	1.034	0.761	1.326	0.912	0.94	0.921	0.844	1.144	0.862	0.364	1.558
Al2O3	14.8372	14.9887	15.5772	16.0966	16.2711	16.5051	17.4312	16.6545	15.8494	17.6725	16.3429	15.5748	15.9226	16.5907	16.3131	16.4178	15.8118	17.7074	17.8133	18.23	18.68	17.45	15.13	17.91	18.02	18.33	18.18	18.53	17.96	18.43	18.2	18	18.66	18.44	17.9	18.57	18.12	19.34	18.59	17.49	17.2	17.39	17.36	18	18.38	19.84	17.12	19.17	17.11
FeO*	9.2516	7.49788	9.20013	6.92919	7.2364	10.5456	4.91446	4.2294	3.75353	5.1129	4.26086	6.44698	4.13621	5.25373	4.19315	4.11163	8.81814	10.8297	4.55727	5.75	5.03	4.98	1.45	4.17	5.03	5.41	5.23	5.65	5.86	6.13	4.05	3.38	4.3	4.06	7.13	4.88	4.74	6.66	6.95	5.38	8.18	5.55	4.98	6.48	5.24	8.21	6.42	6.62	10.81
MnO	0.157456	0.140796	0.159322	0.127914	0.128585	0.174943	0.0929886	0.0732485	0.069775	0.0942012	0.0811761	0.117564	0.0810419	0.0832324	0.0826944	0.0831689	0.191699	0.164656	0.0889486	0.1	0.101	0.093	0.036	0.08	0.092	0.12	0.079	0.123	0.114	0.118	0.068	0.072	0.076	0.076	0.137	0.092	0.105	0.159	0.162	0.116	0.152	0.122	0.084	0.132	0.102	0.174	0.124	0.124	0.162
MgO	10.8462	8.66638	9.01051	7.2733	7.00955	8.09711	4.53245	3.96203	2.94264	4.97175	3.47523	6.3387	3.56283	4.2807	3.06215	3.14381	7.3359	7.28191	1.75536	2.34	2.05	2.03	0.53	1.94	2.25	2.49	2.47	2.72	3.94	4.39	1.87	1.41	1.95	1.92	5.51	2.28	1.97	4.49	4.86	2.8	5.54	3.36	2.83	3.53	2.73	3.79	4.89	11.25	7.37
CaO	10.0636	8.21878	9.36753	7.81375	8.08727	10.1314	6.4544	5.94673	4.80782	7.42061	5.3581	7.13281	5.25587	6.0577	5.15315	5.27567	7.87382	10.7746	5.57053	6.62	6.54	5.73	2	5.49	6.08	6.34	6.53	6.78	7.12	7.64	5.53	5.05	5.82	5.56	8.34	6.33	6.28	8.71	8.73	6.02	8.45	6.88	5.69	6.49	6.77	9.16	7.65	13.93	10.5
Na2O	2.69895	3.06619	3.12572	3.55381	3.58224	2.84799	4.42539	4.3377	4.21359	4.3323	4.18499	3.4668	3.82192	3.97846	4.06735	4.14214	3.61414	2.90923	4.28822	3.81	4.02	3.68	3.85	4.3	4.03	4.06	3.96	4.23	4.15	4.26	4.31	4.23	4.54	4.38	3.9	4.27	4.37	3.95	3.94	3.78	3.19	3.77	3.61	3.6	4.32	4.06	4.15	1.39	2.97
K2O	0.796432	1.18304	0.86475	1.17842	1.20184	0.87381	1.30285	1.15211	1.37875	0.72637	1.32649	1.14944	1.69494	1.44945	1.3422	1.50402	1.58139	0.770695	1.30756	1.24	1.23	1.56	2.7	1.49	1.34	1.44	1.31	1.12	1.14	0.95	1.41	1.45	1.56	1.39	1.03	1.28	1.22	0.72	0.77	1.81	1.27	1.45	2.27	1.96	1.13	0.68	0.85	0.67	0.73
P2O5	0.145912	0.148144	0.170425	0.221276	0.223555	0.252715	0.195041	0.14034	0.140281	0.189585	0.158727	0.197062	0.150395	0.194498	0.163269	0.161231	0.206539	0.385491	0.239292	0.302	0.27	0.238	0.068	0.238	0.242	0.26	0.255	0.3	0.271	0.29	0.24	0.231	0.237	0.228	0.267	0.258	0.268	0.303	0.29	0.209	0.422	0.267	0.246	0.234	0.283	0.417	0.227	0.046	0.397
Total	100	100	100	100	100	100	100	100	100	100	100	100	100	100	100	100	100	100	100	99.09	99.2	98.98	99.18	99.81	100.574	99.68	99.67	99.82	99.73	99.76	99.66	99.54	99.86	100.26	99.7	99.93	99.04	99.73	99.43	99.31	98.23	98.77	98.85	99.6	99.75	100.125	96.66	98.43	99.017
Mg #	0.67639	0.673277	0.635848	0.651737	0.633292	0.577865	0.621824	0.625489	0.582933	0.634187	0.592523	0.636748	0.605633	0.592278	0.56559	0.576844	0.59729	0.571183	0.407132	0.42	0.42	0.42	0.39	0.45	0.44	0.45	0.46	0.46	0.54	0.56	0.45	0.43	0.45	0.46	0.58	0.45	0.43	0.55	0.55	0.48	0.55	0.52	0.5	0.49	0.48	0.45	0.58	0.75	0.55
Unnormalized TE Data
Ni	148.5	140.4	116.6	95.2	91.3	30.2	53.8	54.1	35	65.2	42	82.4	44.3	53.4	33.3	35.1	100.1	25.9	6	3	4	5	7	8	0	6	6	6	6	36	4	5	4	6	28	4	7	19	22	10	25	6	5	7	6	0	28	125	13
Cr	589.8	541.8	454.9	398.4	365.2	88.7	186.5	193.2	130.6	215	144.8	323.6	152.2	182.9	111	121.1	417.8	70.7	15.3	14	11	17	6	16	26	14	22	17	35	111	6	1	14	11	138	15	19	94	105	43	93	43	39	38	23	17	169	352	91
Sc	33.2	23.7	29.4	21.8	21.2	38.2	13.9	13	10.2	15.7	11.3	20.5	11.3	14.3	9.9	11.1	26.6	34.9	7.8	16	12	12	5	7	8	8	4	19	21	13	5	0	0	8	23	10	13	17	18	14	31	23	12	18	14	27	17	35	38
V	267	197.1	245	178.6	184.5	293	115.2	102.7	75.4	123.5	93.6	161.9	91.9	117.6	88.9	88.9	189.8	276.1	61.8	95	88	67	19	55	65	77	66	96	134	118	64	19	66	55	175	60	76	164	181	93	223	156	80	107	96	162	163	133	285
Ba	321.7	521.1	371.3	554.7	549.7	346.9	679.4	574.4	757.6	410.5	781.6	535.9	795.8	681.3	756.6	777.4	768.4	322.7	844.6	811	818	745	1644	896	681	939	702	762	658	667	872	899	855	860	334	779	809	643	520	768	648	642	819	597	605	317	427	179	286
Rb	14	27.2	17.3	26.5	28.1	17.8	32.2	27.7	32.8	14.7	33.7	25.5	41	39.9	40.2	43.3	37.7	14	30.6	29	30	39	47	35	33	35	32	24	24	21	33	40	36	33	18	30	27	14	12	43	26	30	72	51	25	10	16	11	11
Sr	564.8	573.4	601.4	711.3	737.2	528.5	826.4	803.3	726.5	984	787.6	714	758.2	766.9	788.4	777.1	632.7	666.5	806.2	741	773	621	434	794	665	731	662	761	1028	862	863	846	881	819	674	768	785	905	782	564	571	577	581	475	770	805	738	429	597
Zr	62.2	73	82.2	81.5	117.4	58.4	126.2	95.5	93.9	82.8	107.2	109	102.3	116.2	118.2	118.5	114.1	61.4	156.4	153	143	130	83	152	128	136	120	141	140	148	158	175	161	151	129	137	150	176	134	143	143	115	133	127	151	151	135	36	84
Y	17.1	15.1	18.5	15.7	15.8	25	11.5	10.2	10.2	12	10.9	16.4	9.8	12.9	9.9	12.1	22.2	25.4	11.3	14	13	12	5	9	12	16	12	18	17	15	9	8	10	9	20	13	14	21	20	19	23	18	13	24	15	26	17	6	25
Nb	4.4	5.2	5	4.3	5.4	4.6	7.6	2.8	4.5	4.2	4.4	5.6	4	4	4.6	5.2	6.8	4.3	8.5	8.4	8.5	6.4	4.5	10.5	6.2	7.6	6.1	8.8	5	7.7	8.6	8.2	7.9	7.9	6.5	7.4	7.2	10.6	6.5	9.8	10.7	7.7	7.1	5.8	8.9	9.2	8.1	0.9	4.3
Ga	16.9	18.8	19.8	18.7	19.6	21.5	19.3	18.8	20.3	17.9	19.1	19.3	17.6	20.7	19.2	19	21	20.1	21.6
Cu	39.1	27.4	32.6	23.7	21.7	6.5	6	3.7	21.1	14.4	3.7	23.5	5.1	11	2.1	7.3	62.4	122.9	2.1	0	0	0	0	6	0	1	2	2	3	10	0	2	1	4	18	5	0	20	36	8	22	4	0	4	0	6	12	8	144
Zn	85.8	79.7	86.8	77.5	80.6	105.6	56.8	46.8	66.1	51.7	56.5	72	51.2	53.5	58.4	60.5	108.5	101.2	89	115	102	98	58	102	94	98	97	105	148	103	94	96	97	88	98	101	89	97	102	83	108	77	108	106	94	106	87	50	93
Pb	1.3	4	1.9	3.8	3.2	2.4	5.5	5.1	5.9	4.3	4.1	3.5	5.8	5.7	4.8	4.8	2.9	3.4	4.3
La	4.6	8.3	9.8	7.4	12.2	10.6	14.7	43.5	14.5	11.4	9.6	12.4	10.2	11.3	9.1	12.5	10.9	7.2	20
Ce	14.3	27.8	26.4	30.1	27	21.8	29.8	73.9	20.8	21.9	21.2	25	22.1	25.7	19.2	29.7	27.8	16.4	38.8
Th	0	0.9	1.9	0.8	2.1	1.6	2.2	11.4	2.9	2.1	2.3	2.2	2.3	2.3	1.3	3	1.1	0	3.5
Nd	11.8	13.1	17.5	17	17.6	13.4	13.7	18.7	9.7	10.7	12.9	15.5	11.8	16.7	11.5	14.4	21.1	14.8	18.1
U	0	1.5	1.7	1.6	2.6	1	1.9	0	2.9	1.6	0.6	0.3	0.4	2.6	2	0.8	1.9	1.9	0.6
[truncated: 56 more columns]

## Sheet: ICP-MS
	TENPEAK PLUTON
Unit	SC	SC	SC	SC	SC	SC	SC	SC	SC	SC	SC	SC	SC	SC	SC	SC	SC	SC	IC	IC	IC	IC	IC	IC	IC	IC	IC	IC	IC	IC	IC	IC	IC	IC	IC	IC	IC	IC-Un-named unit	IC-Un-named unit	IC-Un-named unit	IC-White Mountain Lobe	IC-White Mountain Lobe	IC-Northern Mafic Tonalite	IC-Northern Mafic Tonalite	IC-Interlayered Unit	IC-Interlayered Unit	IC-Interlayered Unit	SL-Interlayered Unit	SL-White Mountain Lobe
Sample ID	AKCP-1	AKCP-112A-M	AKCP-115B	AKCP-119	AKCP-121-A	CCE4A	AKCP-17B	AKCP-2	AKCP-17	AKCP-112A-F	AKCP-113	AKCP-115A	AKCP-118	AKCP-122	AKCP-123	AKCP-124	AKCP-111	AKCP-4	AKCP-121-IC	97TP91	97TP87C	97TP97	97TP93B	97TP-94	95TP11	96TP-52	99TP-151	99TP-153a	99TP-153b	99TP-154a	99TP-155a	99TP-155b	99TP-156a	99TP-157b	99TP-163	99TP-165	TPM-145	98TP-102c	98TP-124d/TP-313d	98TP-127/TP-356	97TP-79B	97TP-80	98TP-130/TP-320-1	98TP-133	95TP-10B	95TP-6	95TP-8	95TP-7	95TP-5
Reference	Chan et al. (2017)	Chan et al. (2017)	Chan et al. (2017)	Chan et al. (2017)	Chan et al. (2017)	Chan et al. (2017)	Chan et al. (2017)	Chan et al. (2017)	Chan et al. (2017)	Chan et al. (2017)	Chan et al. (2017)	Chan et al. (2017)	Chan et al. (2017)	Chan et al. (2017)	Chan et al. (2017)	Chan et al. (2017)	Chan et al. (2017)	Chan (2012)	Chan (2012)	Miller et al. (2018)	Miller et al. (2018)	Miller et al. (2018)	Miller et al. (2018)	Miller et al. (2018)	Miller et al. (2018)	Miller et al. (2018)	Miller et al. (2018)	Miller et al. (2018)	Miller et al. (2018)	Miller et al. (2018)	Miller et al. (2018)	Miller et al. (2018)	Miller et al. (2018)	Miller et al. (2018)	Miller et al. (2018)	Miller et al. (2018)	Miller et al. (2018)	Miller et al. (2018)	Miller et al. (2018)	Miller et al. (2018)	Miller et al. (2018)	Miller et al. (2018)	Miller et al. (2018)	Miller et al. (2018)	Miller et al. (2018)	Miller et al. (2018)	Miller et al. (2018)	Miller et al. (2018)	Miller et al. (2018)
La	7.18693	10.1796	11.302	11.4716	8.66554	9.33694	49.8127	11.853	14.729	8.61217	12.0016	11.7596	11.3488	11.6676	9.37553	14.7765	8.93918	7.7167	20.975	10.9087	11.1355	19.0043	6.53552	17.4851	25.1888	26.0665	10.5004	13.0447	19.1564	12.9643	16.9597	22.7929	20.2258	20.2975	12.8728	14.0068	9.40362	15.3738	13.4085	10.5428	20.4902	15.4668	12.8067	9.47655	16.1187	13.7866	11.4677	13.9663	23.3093
Ce	17.683	19.8039	26.3203	26.1641	20.2816	21.5186	74.1664	24.1065	29.7893	21.7536	23.8732	26.1065	23.0089	25.148	20.2111	29.1972	26.7184	19.9053	40.5577	24.0508	24.3272	36.6195	12.8427	32.1714	47.8219	50.265	22.1344	28.454	37.7598	30.0938	32.0709	44.803	37.2771	36.3205	27.5132	29.3171	20.3664	33.1768	28.9135	22.9222	40.9349	31.5911	26.0578	22.5889	32.4154	32.46	24.5598	30.4879	43.1838
Pr	2.66262	2.54572	3.76738	3.70516	3.20888	3.02622	6.67227	3.04254	3.7191	3.30583	3.0817	3.62779	2.94848	3.37051	2.80682	3.63311	4.46031	3.26965	4.92932	3.2857	3.42769	4.38291	1.58667	3.78743	5.5292	5.94593	2.95119	3.85195	4.68551	4.31039	3.88999	5.48229	4.35507	4.13195	3.72272	3.87334	2.76785	4.50445	3.83634	3.20253	5.37303	3.87585	3.37546	3.25359	4.19905	4.58479	3.3335	4.03483	4.92636
Nd	12.8689	10.9927	16.5334	16.2132	15.9372	13.3019	20.8424	12.2322	14.6272	15.4774	12.5145	15.8147	11.8989	14.4346	11.9998	14.3739	21.0949	16.9576	19.3445	15.2113	15.9482	18.4263	6.6783	15.549	21.8821	24.2115	13.5275	18.0542	20.431	19.8621	16.3185	22.3993	17.7028	16.4225	17.1635	17.4724	12.7672	20.5481	17.4769	14.9951	24.5016	16.5542	15.3195	15.6996	18.647	21.7601	15.2301	18.1341	20.2995
Sm	3.47127	2.53955	3.89659	3.75062	4.66644	3.19093	3.05846	2.67806	3.01198	4.00576	2.64677	3.66938	2.48345	3.29896	2.62241	2.96553	5.30176	4.84187	3.79647	3.96873	4.19233	4.03151	1.81623	3.39903	4.29769	5.10427	3.6562	4.65807	4.84103	5.11474	3.70752	4.70141	3.84088	3.5462	4.40446	4.37867	3.13554	5.06123	4.25318	4.07104	5.986	4.09324	4.02911	4.49067	4.59166	5.5371	4.11348	4.47629	4.36724
Eu	1.14599	0.879186	1.22777	1.23736	1.50326	1.07237	0.978052	0.848917	1.12016	1.31531	0.868032	1.14597	0.828035	1.01568	0.895878	0.957094	1.45308	1.51786	1.25077	1.33834	1.28224	1.26761	0.515339	1.15917	1.30722	1.49465	1.28092	1.45298	1.50848	1.63444	1.28856	1.46922	1.32898	1.25116	1.47719	1.37155	1.14264	1.70161	1.43835	1.27579	1.7471	1.26109	1.40177	1.29999	1.46343	1.75669	1.26169	1.35766	1.285
Gd	3.62809	2.39673	3.5922	3.49194	4.99669	3.11432	2.35847	2.32535	2.73102	3.96394	2.31319	3.37754	2.17748	2.88121	2.36496	2.4548	4.81302	5.24273	3.06066	3.67762	3.89165	3.4219	1.45553	2.71032	3.48216	4.27985	3.29352	4.17612	4.17789	4.39761	2.86121	3.36948	2.97416	2.7712	4.26354	3.91844	3.04168	4.61878	3.95689	3.92312	5.30994	3.73675	3.75231	4.69319	4.04012	5.30102	3.89359	3.95	3.68645
Tb	0.582699	0.377188	0.551889	0.551378	0.817966	0.503072	0.345252	0.343155	0.406791	0.621712	0.35555	0.522813	0.328023	0.448279	0.347587	0.381627	0.767411	0.836714	0.4282	0.526249	0.576201	0.491624	0.189673	0.359129	0.490569	0.63437	0.504386	0.626924	0.619156	0.617939	0.38792	0.405586	0.400559	0.388047	0.662221	0.553022	0.464135	0.719145	0.614229	0.649187	0.801531	0.577458	0.543649	0.78425	0.559663	0.8445	0.581128	0.561771	0.55704
Dy	3.40865	2.2342	3.17806	3.09782	4.93643	2.8989	1.96042	1.93011	2.29594	3.66231	2.0338	3.01716	1.88784	2.53288	1.96055	2.1238	4.37639	5.00732	2.25426	2.94355	3.35276	2.64169	0.936924	1.79135	2.60903	3.58592	2.86903	3.50241	3.54734	3.28784	1.87198	1.90963	2.02753	2.0177	3.98664	2.9105	2.58972	4.15054	3.68916	3.91729	4.49066	3.41013	2.79307	4.87403	3.01652	4.96634	3.36428	3.14695	3.1221
Ho	0.663981	0.42475	0.598184	0.590949	0.968877	0.576728	0.374798	0.374976	0.456823	0.700818	0.376219	0.583231	0.357106	0.483682	0.370842	0.404448	0.844397	1.00976	0.408561	0.536777	0.631704	0.480236	0.168753	0.307491	0.458847	0.666665	0.521236	0.639547	0.661989	0.596014	0.320151	0.307418	0.356673	0.363839	0.782926	0.513265	0.504767	0.81934	0.727238	0.775366	0.873365	0.683774	0.496666	1.00645	0.548525	0.98727	0.642209	0.602072	0.59921
Er	1.70089	1.09858	1.56885	1.56307	2.57943	1.50552	0.969243	0.954634	1.16769	1.79516	0.974709	1.52114	0.922749	1.25735	0.958793	1.02997	2.17204	2.58161	1.05133	1.38556	1.6194	1.22682	0.421204	0.790768	1.16174	1.81114	1.3702	1.68186	1.72669	1.50325	0.747551	0.698644	0.881468	0.916683	2.06682	1.30351	1.27983	2.1901	1.94601	2.07698	2.2234	1.81409	1.24036	2.66945	1.27954	2.60966	1.65286	1.50675	1.59149
Tm	0.230624	0.154524	0.220245	0.220561	0.35836	0.206545	0.139857	0.140052	0.16603	0.249265	0.140419	0.219217	0.133081	0.179047	0.137429	0.149293	0.312394	0.352164	0.146643	0.194393	0.227764	0.161069	0.0623595	0.108441	0.148575	0.251179	0.185754	0.231453	0.237347	0.207972	0.104024	0.0904784	0.122568	0.127861	0.295951	0.177239	0.18501	0.311019	0.268932	0.306966	0.302755	0.2619	0.166975	0.397732	0.180528	0.37937	0.229699	0.211272	0.221219
Yb	1.4078	0.942868	1.37554	1.33799	2.12177	1.30642	0.84414	0.88255	1.02187	1.53133	0.878558	1.33669	0.828014	1.1213	0.839594	0.951446	1.95568	2.07195	0.891418	1.16347	1.3821	0.996722	0.371725	0.62603	0.949088	1.56346	1.10317	1.39563	1.44815	1.23796	0.61376	0.526389	0.717986	0.768467	1.76274	1.03776	1.14259	1.91814	1.67438	1.86856	1.82029	1.56868	0.99431	2.44513	1.08643	2.3537	1.35407	1.23803	1.42967
Lu	0.215968	0.148634	0.211427	0.211657	0.318651	0.206196	0.134526	0.144191	0.169766	0.232022	0.12855	0.203991	0.124161	0.170794	0.127772	0.144056	0.299928	0.308873	0.136792	0.18464	0.22332	0.154493	0.0601941	0.106901	0.13908	0.24511	0.176507	0.221278	0.219494	0.193791	0.0949942	0.0852746	0.11233	0.121749	0.283833	0.160237	0.180002	0.304888	0.263393	0.295368	0.28932	0.259444	0.160825	0.395551	0.169352	0.368448	0.212584	0.193877	0.229682
Ba	319.648	400.167	546.614	542.776	339.443	518.031	580.26	770.125	693.404	359.199	785.639	531.047	801.781	678.174	756.384	773.208	751.285	322.513	840.703	750.075	724.388	737.407	1584.77	866.88	744.588	846.151	719.543	782.632	647.638	657.618	880.981	899.024	876.849	881.071	323.023	753.766	790.604	632.084	541.603	749.064	641.183	601.689	833.421	548.886	641.89	318.27	429.066	639.16	629.758
Th	0.427078	2.4734	1.3518	2.37154	2.12566	1.1171	11.5951	3.65214	3.05282	0.918203	2.27693	1.95918	2.1513	2.13663	1.32644	2.55526	0.983311	0.959877	3.12292	0.71286	0.802021	3.2967	1.36402	2.30504	4.07101	3.99802	1.19745	0.630869	3.2425	0.602834	1.71753	4.59353	2.30466	2.58233	0.699035	1.90357	0.981513	0.282566	0.31344	1.42362	2.27872	2.74123	1.80443	0.600685	2.28818	0.734334	1.28715	0.987607	4.8932
Nb	3.7064	3.23998	4.49771	5.17436	3.25071	4.0151	3.46626	5.00579	6.68761	4.16813	4.12209	4.42835	3.89855	3.72659	4.15259	4.8208	5.87835	3.29148	7.95139	7.77524	7.95567	6.37494	4.71584	7.53316	7.10151	8.017	6.39429	8.79333	4.66723	7.08013	7.9082	8.264	8.0827	6.9547	4.97583	7.73874	7.19944	9.21594	6.73279	9.04834	10.2659	8.03145	7.75574	5.5375	8.00654	9.44488	6.58043	7.96292	10.6204
Y	16.4847	10.7773	15.5572	15.2035	24.017	14.4441	9.59239	9.67725	11.5166	18.1235	9.83989	15.102	9.21296	12.3417	9.55936	10.4513	21.9905	24.5434	10.7473	14.5929	17.3706	13.0997	5.06661	8.72432	12.5353	18.5807	14.3485	17.8732	17.6949	15.8586	8.47005	8.26779	9.41688	9.68453	20.3588	13.82	13.2765	22.5505	19.1999	21.352	23.4123	18.5304	13.3252	26.5983	14.8352	26.9308	17.3038	16.0406	17.0053
Hf	2.04821	2.34268	2.4302	3.13401	2.00978	2.10566	2.48362	2.72018	3.43013	2.48578	2.80291	3.03252	2.72824	3.09689	3.0373	3.10925	3.02786	2.05077	3.79257	3.40378	3.39163	2.67292	2.62208	3.87765	2.62749	3.92657	3.19403	3.75449	3.40615	3.79107	3.74211	4.34335	3.83242	3.77096	3.20756	3.61929	2.53256	4.0397	3.04379	3.8866	3.21838	3.0857	3.2688	3.44355	3.7018	3.56637	3.17802	2.88399	3.4468
Ta	0.25758	0.270551	0.283764	0.322079	0.192634	0.290765	0.403656	0.436824	0.636113	0.243577	0.27419	0.262265	0.205423	0.177474	0.223613	0.294882	0.27191	0.20009	0.33723	0.437212	0.475955	0.362469	0.325756	0.296137	0.295866	0.477861	0.328819	0.449925	0.17944	0.271831	0.294665	0.483079	0.310009	0.346181	0.278332	0.377526	0.466191	0.422961	0.327128	0.592785	0.632277	0.491379	0.4903	0.374252	0.407913	0.542279	0.387923	0.347698	0.627724
U	0.308612	0.919495	0.706626	1.16948	0.43495	0.533618	1.22064	1.77085	1.97353	0.404097	1.18064	0.962095	0.797495	1.00169	0.604676	0.832557	0.636202	0.235941	0.45158	0.573075	0.52505	0.753741	1.70472	0.490947	0.608403	0.932153	0.331342	0.407865	0.6511	0.17239	0.301646	1.2206	0.281973	0.428932	0.32512	0.360929	0.609845	0.244498	0.160562	0.957998	0.692941	1.24429	1.25077	0.795604	0.513222	0.906648	0.762584	0.752737	1.42792
Pb	2.0395	4.05033	3.28458	3.50299	2.4037	2.97483	4.726	4.71687	5.01967	2.54844	4.27615	3.48126	5.06116	5.6795	4.59064	5.11331	3.55579	2.77286	4.19207	4.00685	3.63431	5.63954	14.1363	4.51121	5.01767	5.33058	4.39579	4.10773	4.17049	2.93535	5.30769	6.42646	6.30941	4.91996	3.76039	4.51113	4.15762	4.14767	4.54312	7.51899	5.22225	6.52856	7.67735	8.4382	3.91872	4.60473	4.53251	5.5764	7.44904
Rb	13.6048	13.8304	25.3014	26.051	16.7076	25.674	27.258	32.896	30.9921	16.1289	32.433	24.8766	39.8703	37.6815	38.1537	41.0686	35.2838	13.3945	29.5703	25.1353	24.9924	38.1527	43.2873	32.3979	35.5235	31.2938	32.4037	25.4767	23.9354	17.9805	32.0054	38.9387	33.8857	32.9143	16.8818	28.5539	27.5428	14.0958	14.563	43.7125	25.9631	32.1868	68.4282	48.2752	28.0679	11.1234	15.3962	25.4791	38.348
Cs	0.517393	0.827952	0.936987	1.31358	0.737246	1.12164	1.42421	0.993744	1.58412	0.921182	1.57031	0.927808	1.14645	2.2787	2.05184	1.48531	1.37675	0.587048	0.664735	0.6897	0.58463	1.40549	0.561937	0.798673	1.00245	1.0836	0.808972	0.504841	0.541872	0.304341	1.16319	1.06404	0.840531	0.779027	0.631298	0.766392	0.960936	0.217376	0.268319	1.18562	1.23843	1.34052	2.53167	1.9429	0.759187	0.427519	0.772418	0.980017	1.90163
Sr	553.834	932.84	685.875	705.807	509.675	542.838	804.046	722.957	814.159	574.059	764.468	682.887	732.678	736.378	761.84	739.419	605.54	668.095	782.055	755.592	779.683	634.348	429.015	825.501	667.881	708.643	690.274	825.698	1068.57	865.37	858.282	868.339	875.89	818.849	689.507	765.435	788.369	958.164	817.123	594.484	573.351	588.374	573.86	486.97	779.491	813.858	756.037	721.492	633.121
Sc	35.6237	15.1272	21.4248	21.3245	39.3232	25.0208	12.8161	10.8886	14.101	29.3459	11.3543	19.9344	11.6183	14.7852	10.3869	10.4654	26.0605	33.7237	7.68549	9.95125	11.1675	10.5585	2.6313	6.89812		12.1057	10.2697	11.5431	18.4104	14.0685	5.95621	4.2167	6.67513	6.74373	24.1454	10.8323	8.37932	19.6132	21.1692	15.6637	26.586	19.5276	13.2674	20.7561	13.4145		23.3462
Zr	62.9691	87.086	83.9226	117.992	59.7111	69.3857	90.0688	89.7444	126.752	82.4441	103.238	106.274	102.699	114.42	115.878	115.986	112.691	61.25	152.444					146.644		148.702	120.005	141.107	130.784	140.143	140.239	166.338	146.123	141.388	121.614	134.167		171.659	122.147	143.808				123.381
[truncated: 47 more columns]

## Sheet: Oxygen
Sample Number	#	Zircon	Spot	16O	16O err	18O	18O err	18O/16O	18O/16O 1σ	δ18O	δ18O 1σ	RSF	18O/16O corrected	18O/16O 1σ	R33	5.55
															18O/16O	0.00201633
															1 s.d. JW546	0.32492
															1 s.d. JW547	0.131131
R33	R33_JW546@1.ais	JW546	1	3284962000	2112175	6612887	4335.26	0.00201308	1.15713e-07	3.92902	0.0577064	0.998388
R33	R33_JW546@2.ais	JW546	2	3274223000	1950365	6593303	4046.57	0.0020137	1.30946e-07	4.23893	0.0653031	0.998696
PX10-154	154_1_1.ais	1	1	3272558000	1678521	6603757	3501.14	0.00201792	9.56934e-08				0.00202059	9.58202e-08	7.67642	0.0474218
PX10-154	154_2_1.ais	2	1	3265575000	1893023	6589406	3898.12	0.00201784	1.31934e-07				0.00202051	1.32109e-07	7.63647	0.0653838
PX10-154	154_3_1.ais	3	1	3262442000	1497716	6583326	3308.65	0.00201791	1.29427e-07				0.00202059	1.29599e-07	7.67342	0.0641393
PX10-154	154_4_1.ais	4	1	3255514000	1609996	6569442	3088.43	0.00201794	1.1971e-07				0.00202062	1.19869e-07	7.6884	0.0593229
PX10-154	154_5_1.ais	5	1	3235732000	1349986	6529138	2678.78	0.00201782	9.93252e-08				0.0020205	9.94568e-08	7.62898	0.0492239
R33	R33_JW546@3.ais	JW546	3	3214072000	969680	6472132	1832.48	0.00201369	1.18205e-07	4.23203	0.0589493	0.998689
R33	R33_JW546@4.ais	JW546	4	3199885000	1319836	6445141	2784.15	0.00201418	1.01791e-07	4.47782	0.0507634	0.998934
PX10-154	154_6_1.ais	6	1	3201497000	1862146	6461108	3876.2	0.00201815	1.50215e-07				0.00202051	1.50391e-07	7.63727	0.0744319
PX10-154	154_7_1.ais	7	1	3186623000	1523891	6432652	3198.09	0.00201864	7.58303e-08				0.002021	7.5919e-08	7.88192	0.037565
PX10-154	154_8_1.ais	8	1	3184421000	986765	6425610	2110.47	0.00201783	1.57908e-07				0.00202019	1.58093e-07	7.475	0.0782567
PX10-154	154_9_1.ais	9	1	3170428000	2218273	6397835	4439.85	0.00201797	1.73615e-07				0.00202033	1.73818e-07	7.5474	0.0860343
PX10-154	154_10_1.ais	10	1	3160710000	2310429	6378876	4709.76	0.00201818	1.33795e-07				0.00202054	1.33952e-07	7.65025	0.0662951
R33	R33_JW546@5.ais	JW546	5	3152289000	1799179	6347705	3598.97	0.00201368	1.13098e-07	4.2296	0.0564023	0.998687
R33	R33_JW546@6.ais	JW546	6	3136286000	1956292	6317546	3680.22	0.00201434	2.51633e-07	4.55826	0.12549	0.999014
PX10-154	154_11_1.ais	11	1	3125331000	1561160	6306574	3224.79	0.00201789	7.52641e-08				0.0020205	7.53614e-08	7.62991	0.0372984
PX10-154	154_12_1.ais	12	1	3108736000	1529500	6273978	3174.39	0.00201818	1.78683e-07				0.00202079	1.78914e-07	7.77272	0.0885369
PX10-145	145_1_1.ais	1	1	3129010000	2463794	6305893	4988.03	0.0020153	1.51419e-07				0.00201791	1.51615e-07	6.3366	0.0751346
PX10-145	145_2_1.ais	2	1	3125621000	1887891	6299586	3965.24	0.00201547	1.28039e-07				0.00201807	1.28205e-07	6.41999	0.0635283
PX10-145	145_3_1.ais	3	1	3119171000	1315596	6288666	2677.67	0.00201613	1.10858e-07				0.00201874	1.11002e-07	6.75305	0.0549856
R33	R33_JW546@7.ais	JW546	7	3097502000	1912899	6236212	3669.13	0.0020133	1.49794e-07	4.04136	0.0747028	0.9985
R33	R33_JW546@8.ais	JW546	8	3098442000	1984497	6238943	4110.88	0.00201357	1.54837e-07	4.17621	0.0772179	0.998634
PX10-145	145_4_1.ais	4	1	3091045000	1363744	6229899	2620.48	0.00201547	1.53989e-07				0.00201795	1.54179e-07	6.35815	0.0764038
PX10-145	145_5_1.ais	5	1	3101180000	1703858	6249010	3235.97	0.00201504	1.32752e-07				0.00201752	1.32916e-07	6.14643	0.0658806
PX10-145	145_6_1.ais	6	1	3070288000	1771011	6186978	3529.99	0.00201511	1.87741e-07				0.00201759	1.87972e-07	6.18139	0.0931664
TP11	TP11_1_1.ais	1	1	3073043000	1361716	6204174	2884.57	0.0020189	1.72072e-07				0.00202139	1.72284e-07	8.0733	0.0852307
TP11	TP11_2_1.ais	2	1	3061549000	2314379	6180733	4798.04	0.00201883	1.4817e-07				0.00202131	1.48353e-07	8.03485	0.0733944
R33	R33_JW546@9.ais	JW546	9	3051350000	3032143	6144763	6107.98	0.00201379	8.14698e-08	4.28148	0.0406293	0.998738
R33	R33_JW546@10.ais	JW546	10	3056039000	1386610	6157097	2909.82	0.00201473	2.47194e-07	4.75307	0.123276	0.999208
TP11	TP11_3_1.ais	3	1	3061667000	1807502	6181528	3407.55	0.00201901	1.56905e-07				0.00202116	1.57072e-07	7.95868	0.0777138
TP11	TP11_4_1.ais	4	1	3062917000	931112	6183685	2046.79	0.00201889	1.24559e-07				0.00202104	1.24691e-07	7.89877	0.0616967
TP11	TP11_5_1.ais	5	1	3050901000	2156142	6160555	4557.91	0.00201926	1.14577e-07				0.00202141	1.14699e-07	8.08299	0.0567422
TP11	TP11_6_1.ais	6	1	3034310000	1960136	6125131	3802.51	0.00201862	1.52709e-07				0.00202077	1.52871e-07	7.76698	0.0756498
TP11	TP11_7_1.ais	7	1	2978418000	1533375	6011934	3046.76	0.0020185	1.1864e-07				0.00202065	1.18767e-07	7.70457	0.0587765
TP11	TP11_8_1.ais	8	1	2955606000	1192700	5966395	2420.97	0.00201867	1.4303e-07				0.00202082	1.43182e-07	7.79044	0.0708536
R33	R33_JW546@11.ais	JW546	11	2958211000	1806028	5957715	3733.89	0.00201396	9.18434e-08	4.36793	0.0458026	0.998825
R33	R33_JW546@12.ais	JW546	12	2943301000	1732299	5928567	3533.69	0.00201426	1.14396e-07	4.51723	0.0570497	0.998973
PX10-154	154_1_2.ais	1	2	2960546000	1720363	5976923	3460.6	0.00201886	1.85968e-07				0.00202135	1.86197e-07	8.05446	0.0921152
PX10-154	154_2_2.ais	2	2	2942892000	685266	5941799	1514.1	0.00201903	1.62999e-07				0.00202153	1.632e-07	8.14184	0.0807312
PX10-154	154_3_3.ais	3	3	2922441000	1182551	5896205	2251.39	0.00201756	1.1534e-07				0.00202005	1.15483e-07	7.40684	0.0571681
PX10-154	154_4_2.ais	4	2	2917639000	1676203	5887735	3318.23	0.00201798	1.19068e-07				0.00202047	1.19215e-07	7.61506	0.0590036
PX10-154	154_5_2.ais	5	2	2905493000	2182495	5864429	4441.29	0.00201839	1.38921e-07				0.00202089	1.39092e-07	7.82228	0.0688273
R33	R33_JW546@13.ais	JW546	13	2898689000	1540724	5839905	4296.85	0.00201467	4.65076e-07	4.72208	0.231935	0.999177
R33	R33_JW546@14.ais	JW546	14	2887085000	1316627	5810220	2059.21	0.00201249	2.75706e-07	3.6343	0.137495	0.998095
PX10-154	154_6_3.ais	6	3	2884494000	1545861	5820717	3105.57	0.00201793	1.25787e-07				0.00202051	1.25947e-07	7.63487	0.0623344
PX10-154	154_7_3.ais	7	3	2877204000	1688856	5806349	3661.82	0.00201805	1.63438e-07				0.00202063	1.63646e-07	7.69429	0.0809878
PX10-154	154_8_3.ais	8	3	2866794000	7269835	5788400	14168.5	0.00201912	2.34061e-07				0.0020217	2.3436e-07	8.22958	0.115922
PX10-154	154_9_2.ais	9	2	2869334000	1982865	5785438	3963.4	0.0020163	1.51793e-07				0.00201887	1.51987e-07	6.81945	0.0752829
PX10-154	154_10_2.ais	10	2	2860273000	1399353	5772515	3121.45	0.00201817	1.45164e-07				0.00202075	1.45349e-07	7.75271	0.0719286
R33	R33_JW546@15.ais	JW546	15	2869228000	1441505	5776623	2331.88	0.0020133	3.93063e-07	4.04126	0.196022	0.9985
R33	R33_JW546@16.ais	JW546	16	2858839000	911234	5759334	2189.95	0.00201457	2.8133e-07	4.67328	0.1403	0.999128
PX10-154	154_11_2.ais	11	2	2851601000	1472942	5756589	3025.09	0.00201872	1.18571e-07				0.00202111	1.18711e-07	7.93387	0.0587357
PX10-154	154_12_3.ais	12	3	2866096000	2482124	5783569	5388.03	0.00201792	1.98489e-07				0.00202031	1.98724e-07	7.53544	0.098363
PX10-145	145_1_2.ais	1	2	2859302000	1004383	5764671	2438.86	0.00201611	1.92624e-07				0.00201849	1.92852e-07	6.63022	0.0955425
PX10-145	145_2_2.ais	2	2	2864452000	906774	5773000	1839.78	0.00201539	1.97245e-07				0.00201778	1.97479e-07	6.27223	0.0978693
PX10-145	145_3_2.ais	3	2	2848210000	504343	5744909	1172.92	0.00201702	2.44082e-07				0.00201941	2.4437e-07	7.08608	0.121011
R33	R33_JW546@17.ais	JW546	17	2830145000	1119048	5702659	1635.98	0.00201497	3.55798e-07	4.87306	0.177437	0.999327
R33	R33_JW546@18.ais	JW546	18	2825644000	2259991	5687857	4093.75	0.00201294	2.75828e-07	3.86172	0.137556	0.998321
PX10-145	145_4_2.ais	4	2	2836274000	1426849	5715860	2944.82	0.00201527	1.09903e-07				0.00201751	1.10024e-07	6.1375	0.0545348
PX10-145	145_5_2.ais	5	2	2824335000	1609393	5694129	3428.47	0.00201609	1.54571e-07				0.00201833	1.54743e-07	6.54889	0.0766686
PX10-145	145_6_2.ais	6	2	2823537000	997365	5689767	2229.03	0.00201512	1.09756e-07				0.00201736	1.09878e-07	6.06211	0.0544663
TP11	TP11_1_3.ais	1	3	2808644000	1469270	5669186	2938.21	0.00201848	1.18138e-07				0.00202072	1.18269e-07	7.73862	0.0585285
TP11	TP11_2_2.ais	2	2	2799972000	1161004	5654125	2314.64	0.00201935	1.30775e-07				0.00202159	1.3092e-07	8.17447	0.0647608
R33	R33_JW546@19.ais	JW546	19	2794212000	928164	5627910	2132.56	0.00201413	1.87368e-07	4.45378	0.0934408	0.99891
R33	R33_JW546@20.ais	JW546	20	2794160000	1825638	5628364	4091.17	0.00201433	2.46794e-07	4.55343	0.123077	0.999009
TP11	TP11_3_3.ais	3	3	2794394000	1197855	5641834	2570.72	0.00201898	1.67478e-07				0.00202122	1.67664e-07	7.99074	0.0829519
TP11	TP11_5_2.ais	5	2	2787167000	1582029	5627579	3113.64	0.0020191	1.23604e-07				0.00202134	1.23741e-07	8.05115	0.0612174
TP11	TP11_5_3.ais	5	3	2771313000	1729632	5595294	3964.16	0.002019	2.34822e-07				0.00202124	2.35082e-07	8.00073	0.116306
TP11	TP11_6_3.ais	6	3	2773135000	951620	5598710	1634.55	0.00201891	1.89305e-07				0.00202115	1.89515e-07	7.9543	0.0937661
R33	R33_JW546@21.ais	JW546	21	2773018000	1275209	5597234	2548.82	0.00201846	1.03064e-07	6.61416	0.0513983	1.00106
R33	R33_JW546@22.ais	JW546	22	2764137000	1617331	5576477	3381.69	0.00201744	1.45483e-07	6.10349	0.0725531	1.00055
R33	R33_JW547@23.ais	JW547	23	3869903000	3510186	7791374	7028.71	0.00201332	1.1687e-07	4.05219	0.0582833	0.99851	0.00201615	1.17034e-07	5.46073	0.0580482
R33	R33_JW547@24.ais	JW547	24	3873839000	3202841	7801034	6382.47	0.00201377	1.13321e-07	4.27579	0.0565134	0.998733	0.0020166	1.1348e-07	5.68496	0.0562728
PX10-221	221_1_1.ais	1	1	3849336000	2870976	7761018	5971.88	0.0020162	1.2706e-07				0.00201902	1.27239e-07	6.89452	0.0630198
PX10-221	221_2_1.ais	2	1	3843053000	2917279	7744895	6232.98	0.0020153	1.30254e-07				0.00201812	1.30437e-07	6.44555	0.0646328
PX10-221	221_3_1.ais	3	1	3846269000	2257284	7756600	3984.79	0.00201666	2.50027e-07				0.00201949	2.50377e-07	7.12474	0.123981
PX10-221	221_4_1.ais	4	1	3805321000	1718922	7667205	3532.04	0.00201486	9.50448e-08				0.00201769	9.51781e-08	6.22931	0.0471718
PX10-221	221_4_2.ais	4	2	3802394000	2771014	7662715	5500.98	0.00201524	8.49426e-08				0.00201806	8.50618e-08	6.41459	0.0421502
R33	R33_JW547@25.ais	JW547	25	3812185000	3347464	7675183	6882.44	0.00201333	1.29199e-07	4.05389	0.064432	0.998512
R33	R33_JW547@26.ais	JW547	26	3806183000	2532825	7664077	4971.32	0.00201359	7.43165e-08	4.18241	0.0370619	0.99864
PX10-221	221_5_1.ais	5	1	3795466000	2858573	7653106	5877.42	0.00201638	1.37028e-07				0.00201919	1.37219e-07	6.97741	0.0679572
PX10-221	221_5_2.ais	5	2	3781765000	4971145	7620871	9813.41	0.00201516	7.97508e-08				0.00201797	7.98619e-08	6.36914	0.0395754
PX10-221	221_6_1.ais	6	1	3808314000	2380074	7676740	4641.9	0.00201578	6.86486e-08				0.00201859	6.87443e-08	6.67976	0.0340555
PX10-221	221_7_1.ais	7	1	3751971000	2738413	7566239	5667.54	0.0020166	6.89621e-08				0.00201941	6.90583e-08	7.08877	0.0341972
PX10-221	221_7_2.ais	7	2	3773160000	3066464	7605519	6176.47	0.00201569	1.07638e-07				0.0020185	1.07788e-07	6.63232	0.0533999
R33	R33_JW547@27.ais	JW547	27	3781745000	2110105	7614633	4405.53	0.00201352	8.76982e-08	4.15081	0.0437354	0.998608
R33	R33_JW547@28.ais	JW547	28	3789482000	2890637	7630697	5883.15	0.00201365	1.36988e-07	4.21492	0.0683164	0.998672
PX10-221	221_8_1.ais	8	1	3775966000	3129705	7613213	6076.69	0.00201623	1.00093e-07				0.00201891	1.00226e-07	6.83737	0.0496437
PX10-221	221_8_2.ais	8	2	3750908000	2659757	7561506	5428.57	0.00201591	1.40152e-07				0.00201859	1.40339e-07	6.67957	0.069523
PX10-221	221_9_1.ais	9	1	3758158000	2732478	7578284	5487.06	0.00201649	1.12942e-07				0.00201917	1.13093e-07	6.9672	0.0560095
PX10-221	221_10_1.ais	10	1	3776770000	2511025	7618002	5243.52	0.00201707	1.15459e-07				0.00201975	1.15612e-07	7.25584	0.057241
PX10-175	175_1_1.ais	1	1	3770786000	2748846	7602437	5682.59	0.00201614	8.68926e-08				0.00201882	8.70081e-08	6.79342	0.0430985
R33	R33_JW547@29.ais	JW547	29	3773034000	2317598	7598207	4662.97	0.00201382	1.13348e-07	4.29831	0.0565271	0.998755
R33	R33_JW547@30.ais	JW547	30	3775566000	2745843	7602520	5741.63	0.00201361	1.12177e-07	4.1943	0.0559431	0.998652
PX10-175	175_2_1.ais	2	1	3757859000	2392906	7577696	5019.25	0.00201649	9.07736e-08				0.00201921	9.08958e-08	6.98558	0.0450156
PX10-175	175_3_1.ais	3	1	3764516000	2331889	7584261	4733.94	0.00201467	1.23565e-07				0.00201738	1.23731e-07	6.07572	0.0613324
PX10-175	175_3_2.ais	3	2	3750979000	3091219	7558418	6212.58	0.00201505	4.84793e-08				0.00201776	4.85445e-08	6.26598	0.0240586
PX10-175	175_4_1.ais	4	1	3758573000	4412981	7573753	8887.88	0.00201506	1.17703e-07				0.00201777	1.17861e-07	6.27047	0.0584114
PX10-175	175_4_2.ais	4	2	3749190000	2882226	7565310	5900.09	0.00201785	7.18312e-08				0.00202057	7.19279e-08	7.66423	0.0355979
R33	R33_JW547@31.ais	JW547	31	3759641000	3341595	7570822	6827.5	0.00201371	1.35182e-07	4.24313	0.0674156	0.9987
R33	R33_JW547@32.ais	JW547	32	3757497000	2562163	7565104	5313.85	0.00201334	1.23948e-07	4.05738	0.0618134	0.998516
PX10-175	175_5_1.ais	5	1	3627114000	5745823	7288500	11478.5	0.00200945	9.80677e-08				0.00201216	9.82e-08	3.4711	0.0488033
PX10-175	175_5_2.ais	5	2	3727865000	2476804	7517583	5203.78	0.00201659	9.61935e-08				0.00201931	9.63233e-08	7.03814	0.047701
PX10-175	175_6_1.ais	6	1	3737149000	2320904	7537803	4600.09	0.00201699	7.44107e-08				0.00201971	7.45111e-08	7.23839	0.0368919
PX10-175	175_7_1.ais	7	1	3724268000	2885511	7509336	5839.55	0.00201633	9.30045e-08				0.00201905	9.313e-08	6.90531	0.0461257
PX10-175	175_8_1.ais	8	1	3738097000	3210046	7533879	6349.33	0.00201543	7.3533e-08				0.00201815	7.36322e-08	6.45886	0.036485
R33	R33_JW547@33.ais	JW547	33	3743464000	3255536	7538226	6663.13	0.0020137	8.24569e-08	4.24053	0.0411215	0.998698
R33	R33_JW547@34.ais	JW547	34	3728568000	2902193	7508222	5767.42	0.0020137	1.0132e-07	4.23955	0.0505287	0.998697
PX10-86	86_1_1.ais	1	1	3738541000	3186769	7561791	6550.95	0.00202266	1.4711e-07				0.0020253	1.47302e-07	10.0259	0.0727309
PX10-86	86_1_2.ais	1	2	3721040000	978694	7509161	2022.11	0.00201803	1.13178e-07				0.00202067	1.13326e-07	7.71333	0.0560835
PX10-86	86_2_1.ais	2	1	3736792000	3409779	7535177	7126.15	0.00201648	1.26923e-07				0.00201912	1.27089e-07	6.94233	0.0629429
PX10-86	86_3_1.ais	3	1	3732184000	2793296	7523704	5650.88	0.0020159	1.06589e-07				0.00201853	1.06728e-07	6.65021	0.052874
PX10-86	86_4_1.ais	4	1	3717968000	3229968	7491986	6296.79	0.00201508	1.44406e-07				0.00201771	1.44595e-07	6.23974	0.0716629
R33	R33_JW547@35.ais	JW547	35	3713154000	3066185	7477096	6339.26	0.00201368	1.14846e-07	4.22763	0.057274	0.998685
R33	R33_JW547@36.ais	JW547	36	3699702000	3576906	7450084	7363.48	0.0020137	9.18614e-08	4.23795	0.0458116	0.998695
PX10-86	86_4_2.ais	4	2	3685110000	3261960	7434763	6615.69	0.00201752	1.16364e-07				0.00202015	1.16516e-07	7.45766	0.0576768
PX10-86	86_5_1.ais	5	1	3703785000	3029575	7467978	6040.92	0.00201631	9.6079e-08				0.00201895	9.62046e-08	6.85594	0.0476509
PX10-86	86_6_1.ais	6	1	3706202000	2986288	7476530	5934.63	0.0020173	9.33503e-08				0.00201994	9.34724e-08	7.3518	0.0462748
PX10-86	86_7_1.ais	7	1	3700547000	2265655	7462920	4491.82	0.00201671	5.14135e-08				0.00201935	5.14808e-08	7.05418	0.0254938
PX10-86	86_7_2.ais	7	2	3693223000	2397766	7448986	4826.71	0.00201693	1.09798e-07				0.00201957	1.09941e-07	7.16754	0.0544379
R33	R33_JW547@37.ais	JW547	37	3684758000	2818448	7422098	5765.91	0.00201427	1.35103e-07	4.52336	0.0673763	0.998979
R33	R33_JW547@38.ais	JW547	38	3696835000	3693234	7457574	7604.26	0.00201729	8.83199e-08	6.02716	0.0440454	1.00047
PX10-86	86_8_1.ais	8	1	3683592000	3025555	7427259	6108.04	0.00201631	1.24792e-07				0.00201868	1.24938e-07	6.7205	0.0618913
PX10-86	86_9_1.ais	9	1	3675786000	2570410	7411447	5148.19	0.00201629	1.37489e-07				0.00201866	1.3765e-07	6.71051	0.0681891
MAF	MAF_1_1.ais	1	1	3699166000	2262814	7457016	4642.78	0.00201586	1.08993e-07				0.00201823	1.09121e-07	6.49832	0.0540677
MAF	MAF_2_1.ais	2	1	3676703000	2999634	7410383	6125.68	0.0020155	1.1593e-07				0.00201786	1.16066e-07	6.31508	0.0575192
MAF	MAF_2_2.ais	2	2	3667335000	3293225	7392517	6771.07	0.00201577	1.09186e-07				0.00201814	1.09315e-07	6.45288	0.0541661
R33	R33_JW547@39.ais	JW547	39	3689712000	2961956	7430087	5965.59	0.00201373	6.60637e-08	4.25437	0.0329462	0.998712
R33	R33_JW547@40.ais	JW547	40	3670472000	2457975	7391939	5084.5	0.00201389	9.57029e-08	4.33524	0.0477274	0.998792
MAF	MAF_3_1.ais	3	1	3661679000	2600986	7383300	5258.28	0.00201637	1.13255e-07				0.00201902	1.13404e-07	6.8924	0.0561679
MAF	MAF_4_1.ais	4	1	3661528000	1998670	7379404	4154.32	0.00201539	9.55127e-08				0.00201804	9.56383e-08	6.40253	0.0473917
MAF	MAF_5_1.ais	5	1	3652973000	3416452	7363998	7255.02	0.00201589	1.71623e-07				0.00201854	1.71848e-07	6.65321	0.0851349
MAF	MAF_6_1.ais	6	1	3653451000	2263999	7363802	4548.69	0.00201557	7.83323e-08				0.00201822	7.84353e-08	6.49541	0.0388635
MAF	MAF_7_1.ais	7	1	3649813000	2733988	7356969	5642.44	0.00201571	1.16628e-07				0.00201836	1.16781e-07	6.56332	0.0578593
R33	R33_JW547@41.ais	JW547	41	3630759000	2877583	7308840	5834.43	0.00201303	1.02163e-07	3.90656	0.050949	0.998365
R33	R33_JW547@42.ais	JW547	42	3622326000	2790291	7295618	5575.51	0.00201407	1.39426e-07	4.42363	0.0695324	0.99888
PX10-243A	243A_1_1.ais	1	1	3644003000	2773893	7351509	5793.6	0.00201743	1.25926e-07				0.00202012	1.26094e-07	7.44311	0.0624191
PX10-243A	243A_2_1.ais	2	1	3639371000	2742984	7349724	5598.14	0.0020195	1.03099e-07				0.0020222	1.03237e-07	8.4803	0.0510517
PX10-243A	243A_3_1.ais	3	1	3637205000	2720655	7337080	5637.52	0.00201723	1.18859e-07				0.00201993	1.19018e-07	7.34474	0.058922
PX10-243A	243A_4_1.ais	4	1	3637057000	3073581	7333859	6117.19	0.00201643	1.09818e-07				0.00201912	1.09965e-07	6.94374	0.0544619
PX10-243A	243A_5_1.ais	5	1	3632576000	2469175	7328213	4970.02	0.00201736	7.0224e-08				0.00202006	7.03179e-08	7.40965	0.0348099
R33	R33_JW547@43.ais	JW547	43	3622394000	2727379	7293525	5313.76	0.00201345	1.3307e-07	4.11652	0.0663626	0.998574
R33	R33_JW547@44.ais	JW547	44	3613490000	2308772	7277524	4735.45	0.00201399	1.07203e-07	4.38228	0.0534627	0.998839
PX10-243A	243A_6_1.ais	6	1	3631009000	3086027	7323507	6197.29	0.00201694	1.171e-07				0.00201955	1.17252e-07	7.15441	0.0580586
PX10-243A	243A_7_1.ais	7	1	3609911000	2114427	7280053	4360.55	0.00201668	1.30547e-07				0.0020193	1.30717e-07	7.02957	0.0647337
PX10-243A	243A_8_1.ais	8	1	3609726000	2884405	7281436	5887.98	0.00201717	1.08902e-07				0.00201978	1.09043e-07	7.27225	0.0539874
PX10-243A	243A_9_1.ais	9	1	3587598000	2633977	7234401	5565.61	0.0020165	1.23133e-07				0.00201911	1.23292e-07	6.93819	0.0610626
PX10-76	76_1_1.ais	1	1	3583527000	2464844	7224275	5036.39	0.00201597	1.19715e-07				0.00201858	1.1987e-07	6.67154	0.0593836
R33	R33_JW547@45.ais	JW547	45	3578769000	2644491	7206347	5488.93	0.00201364	1.20251e-07	4.20803	0.0599696	0.998665
R33	R33_JW547@46.ais	JW547	46	3550066000	8014299	7149155	16042	0.00201381	1.44602e-07	4.29355	0.0721134	0.99875
PX10-76	76_2_1.ais	2	1	3586146000	2245258	7232151	4626.22	0.00201669	8.59724e-08				0.00201922	8.60803e-08	6.99331	0.0426304
PX10-76	76_3_1.ais	3	1	3590393000	2618186	7241110	5808.82	0.0020168	1.86481e-07				0.00201933	1.86715e-07	7.04774	0.0924638
PX10-76	76_4_1.ais	4	1	3582342000	1795589	7219579	3325.24	0.00201532	1.60576e-07				0.00201785	1.60778e-07	6.31073	0.0796776
PX10-76	76_5_1.ais	5	1	3577954000	2548104	7212798	4904.02	0.0020159	1.27065e-07				0.00201843	1.27225e-07	6.59834	0.0630316
PX10-76	76_6_1.ais	6	1	3590286000	1745934	7236878	3505.6	0.00201568	8.33262e-08				0.00201821	8.34308e-08	6.48999	0.041339
R33	R33_JW547@47.ais	JW547	47	3565506000	2701080	7180801	5864.5	0.00201396	1.54609e-07	4.37009	0.0771039	0.998827
R33	R33_JW547@48.ais	JW547	48	3562325000	2773487	7173780	5552.45	0.00201379	1.00807e-07	4.28466	0.050273	0.998742
PX10-76	76_7_1.ais	7	1	3563757000	2868935	7181585	6059.54	0.00201517	1.51762e-07				0.0020177	1.51953e-07	6.23483	0.0753098
PX10-76	76_8_1.ais	8	1	3481232000	11027000	7018938	22445.3	0.00201622	2.09676e-07				0.00201875	2.0994e-07	6.75813	0.103995
PX10-76	76_9_1.ais	9	1	3525590000	1571726	7107177	3294.1	0.00201588	8.47603e-08				0.00201841	8.48667e-08	6.58985	0.0420462
PX10-76	76_10_1.ais	10	1	3528862000	2223960	7113876	4822.51	0.00201591	1.78208e-07				0.00201844	1.78432e-07	6.60383	0.0884008
PX10-76	76_11_1.ais	11	1	3508519000	2585738	7076088	5444.12	0.00201683	1.17502e-07				0.00201936	1.17649e-07	7.06272	0.0582607
R33	R33_JW547@49.ais	JW547	49	3506690000	2600977	7072463	5063.69	0.00201685	1.07018e-07	5.80952	0.0533704	1.00026
R33	R33_JW547@50.ais	JW547	50	3520746000	3168209	7101696	6552.62	0.0020171	1.21073e-07	5.93426	0.0603796	1.00038
R33	R33_JW549@1.ais	JW549	1	3899510000	1591977	7852622	3147.68	0.00201375	8.88697e-08	4.26191	0.0443196	0.998719
R33	R33_JW549@2.ais	JW549	2	3877794000	1820330	7806773	3575.11	0.0020132	1.03221e-07	3.98937	0.0514769	0.998448
AKCP-2	AKCP2_1_2.ais	1	2	3785941000	3150449	7637086	6375.32	0.00201722	1.26197e-07				0.00201988	1.26363e-07	7.32061	0.0625598
AKCP-2	AKCP2_2_1.ais	2	1	3766115000	1394372	7598604	2925.12	0.00201762	1.38451e-07				0.00202028	1.38634e-07	7.52085	0.0686209
AKCP-2	AKCP2_3_1.ais	3	1	3738677000	819211	7544915	1858.21	0.00201807	1.1581e-07				0.00202073	1.15963e-07	7.74406	0.0573866
AKCP-2	AKCP2_3_2.ais	3	2	3735600000	1436014	7536162	2997.8	0.00201739	1.24913e-07				0.00202005	1.25078e-07	7.404	0.0619182
R33	R33_JW549@3.ais	JW549	3	3695525000	1239353	7442318	2512.77	0.00201387	9.4836e-08	4.32521	0.047295	0.998782
R33	R33_JW549@4.ais	JW549	4	3671947000	2836047	7394901	5659.54	0.00201389	9.32312e-08	4.33436	0.0464947	0.998791
AKCP-2	AKCP2_4_1.ais	4	1	3670101000	1856575	7412530	3755.85	0.00201971	9.25222e-08				0.0020222	9.26364e-08	8.47801	0.0458097
AKCP-2	AKCP2_4_2.ais	4	2	3658748000	1552442	7381628	3333.12	0.00201753	1.2872e-07				0.00202002	1.28879e-07	7.38999	0.0638007
AKCP-2	AKCP2_5_1.ais	5	1	3662920000	1548175	7386210	3168.63	0.00201648	1.22931e-07				0.00201897	1.23083e-07	6.8672	0.0609631
AKCP-2	AKCP2_6_1.ais	6	1	3669061000	2353337	7403385	4758.84	0.00201779	6.69669e-08				0.00202028	6.70496e-08	7.51931	0.0331883
AKCP-2	AKCP2_7_1.ais	7	1	3652858000	1487932	7370394	3183.44	0.00201771	1.45748e-07				0.0020202	1.45927e-07	7.47887	0.0722343
R33	R33_JW549@5.ais	JW549	5	3671447000	2208769	7393054	4513.45	0.00201366	8.60945e-08	4.21988	0.0429356	0.998677
R33	R33_JW549@6.ais	JW549	6	3682987000	2246498	7417336	4568.42	0.00201395	1.16846e-07	4.36158	0.0582716	0.998818
AKCP-2	AKCP2_8_1.ais	8	1	3663405000	1841189	7392661	3675.09	0.00201798	8.82606e-08				0.00202058	8.83744e-08	7.6686	0.0437372
AKCP-2	AKCP2_9_3.ais	9	3	3671631000	1314824	7408111	2741.11	0.00201766	9.78161e-08				0.00202026	9.79421e-08	7.51181	0.0484799
AKCP-2	AKCP2_10_1.ais	10	1	3680873000	1697524	7425300	3606.1	0.00201727	1.15173e-07				0.00201987	1.15321e-07	7.31407	0.0570935
AKCP-2	AKCP2_11_1.ais	11	1	3659244000	2568231	7384146	5318.05	0.00201794	9.36396e-08				0.00202054	9.37603e-08	7.65212	0.0464035
AKCP-2	AKCP2_12_1.ais	12	1	3654934000	1838796	7372730	3975.88	0.0020172	1.16331e-07				0.0020198	1.16481e-07	7.28061	0.0576696
R33	R33_JW549@7.ais	JW549	7	3689528000	2268197	7430149	5027.68	0.00201385	1.74288e-07	4.3124	0.0869183	0.998769
R33	R33_JW549@8.ais	JW549	8	3649847000	2743663	7348890	5697.66	0.00201348	7.08522e-08	4.12837	0.0353342	0.998586
IC2	IC2_1_1.ais	1	1	3654719000	1848861	7378275	3726.89	0.00201884	1.11798e-07				0.00202144	1.11942e-07	8.09754	0.0553772
IC2	IC2_2_1.ais	2	1	3661752000	4044234	7392992	8284.97	0.00201898	1.02089e-07				0.00202158	1.0222e-07	8.16795	0.0505646
IC2	IC2_3_1.ais	3	1	3673348000	2545089	7415090	5136.87	0.00201862	9.5801e-08				0.00202122	9.59245e-08	7.98968	0.0474587
IC2	IC2_4_1.ais	4	1	3665802000	2103653	7400227	4704.98	0.00201872	1.48853e-07				0.00202132	1.49044e-07	8.03962	0.0737362
IC2	IC2_5_1.ais	5	1	3670259000	2303444	7408336	4725.68	0.00201848	9.66775e-08				0.00202108	9.68021e-08	7.91927	0.0478962
R33	R33_JW549@9.ais	JW549	9	3670399000	1827712	7401497	3819.55	0.00201654	1.33179e-07	5.65389	0.0664168	1.0001
R33	R33_JW549@10.ais	JW549	10	3636426000	2543154	7327109	5283.16	0.00201492	1.04582e-07	4.84742	0.0521553	0.999301
IC2	IC2_6_1.ais	6	1	3591481000	16590810	7254910	33343.1	0.00202003	1.77648e-07				0.00202287	1.77897e-07	8.80997	0.087943
IC2	IC2_7_1.ais	7	1	3661509000	1584116	7391020	3065.03	0.00201857	1.34027e-07				0.0020214	1.34215e-07	8.07935	0.066397
IC2	IC2_8_1.ais	8	1	3656531000	1620889	7379394	3442.2	0.00201814	1.15522e-07				0.00202097	1.15684e-07	7.86361	0.0572418
IC2	IC2_9_1.ais	9	1	3661022000	2163432	7394540	4614.36	0.0020198	1.0813e-07				0.00202263	1.08282e-07	8.69361	0.053535
AKCP-124	akcp124_1_1.ais	1	1	3657207000	1587189	7387148	3226.31	0.00201989	1.15869e-07				0.00202272	1.16031e-07	8.73656	0.057364
R33	R33_JW549@11.ais	JW549	11	3641391000	1954547	7331568	3963.32	0.0020134	8.34013e-08	4.08812	0.0415925	0.998546
R33	R33_JW549@12.ais	JW549	12	3652305000	1925744	7352925	3694.11	0.00201323	1.19702e-07	4.00418	0.0596959	0.998463
AKCP-124	akcp124_1_2.ais	1	2	3659325000	2425234	7386892	4884.28	0.00201865	1.11502e-07				0.00202148	1.11658e-07	8.1178	0.0552359
AKCP-124	akcp124_2_1.ais	2	1	3663757000	2398423	7401424	5103.54	0.00202017	1.25436e-07				0.002023	1.25612e-07	8.87889	0.0620916
AKCP-124	akcp124_3_1.ais	3	1	3671029000	1478214	7411767	3083.67	0.00201899	1.1366e-07				0.00202182	1.13819e-07	8.2876	0.0562954
AKCP-124	akcp124_4_1.ais	4	1	3627715000	8118338	7317427	16260.8	0.00201709	1.37781e-07				0.00201992	1.37974e-07	7.33973	0.0683068
AKCP-124	akcp124_5_1.ais	5	1	3616494000	1820715	7297414	3721.95	0.00201782	1.41543e-07				0.00202064	1.41741e-07	7.7013	0.0701467
R33	R33_JW549@13.ais	JW549	13	3630444000	2289374	7310217	4728.47	0.00201359	8.67243e-08	4.18278	0.0432497	0.99864
R33	R33_JW549@14.ais	JW549	14	3638333000	2792673	7326934	5726.45	0.00201382	1.32166e-07	4.29689	0.0659115	0.998754
AKCP-124	akcp124_6_1.ais	6	1	3607656000	1139633	7288548	2526.36	0.0020203	9.32423e-08				0.00202186	9.33145e-08	8.30984	0.0461527
AKCP-124	akcp124_7_1.ais	7	1	3626282000	1842215	7317500	3756.3	0.00201791	9.53033e-08				0.00201947	9.5377e-08	7.11552	0.0472288
R33	R33_JW549@15.ais	JW549	15	3615207000	2293810	7286390	4645.03	0.00201548	6.25247e-08	5.12833	0.0311813	0.99958
R33	R33_JW549@16.ais	JW549	16	3632514000	1882314	7323858	3709.83	0.0020162	9.86856e-08	5.48335	0.0492149	0.999934
R33	R33_JW549@17.ais	JW549	17	3656236000	2134628	7361649	4074.45	0.00201345	1.08452e-07	4.11449	0.0540854	0.998572
R33	R33_JW549@18.ais	JW549	18	3695136000	3051949	7442525	6269.42	0.00201414	7.46484e-08	4.45883	0.0372274	0.998915
TP30	TP30_1_1.ais	1	1	3736045000	2495197	7547475	5064.81	0.00202018	1.07184e-07				0.00202261	1.07313e-07	8.68351	0.0530565
TP30	TP30_2_1.ais	2	1	3696995000	1902960	7470317	4066.47	0.00202065	1.26784e-07				0.00202308	1.26936e-07	8.91718	0.0627441
TP30	TP30_3_1.ais	3	1	3716571000	2123395	7511277	4337.14	0.00202102	1.06828e-07				0.00202346	1.06957e-07	9.10542	0.0528585
TP30	TP30_4_1.ais	4	1	3710205000	2493475	7497423	5121.44	0.00202076	1.39649e-07				0.00202319	1.39818e-07	8.97261	0.0691074
TP30	TP30_5_1.ais	5	1	3669800000	12992850	7413862	26089.1	0.00202024	1.04113e-07				0.00202267	1.04239e-07	8.71297	0.0515352
R33	R33_JW549@19.ais	JW549	19	3700275000	1632743	7452341	3289.37	0.002014	1.06481e-07	4.38689	0.0531022	0.998844
R33	R33_JW549@20.ais	JW549	20	3667649000	4252419	7386726	8784.06	0.00201402	1.17339e-07	4.3992	0.0585173	0.998855
TP30	TP30_6_1.ais	6	1	3676077000	1467302	7428333	3139.07	0.00202072	1.09138e-07				0.00202294	1.09258e-07	8.84755	0.0540095
TP30	TP30_7_1.ais	7	1	3653725000	4468297	7380368	9082.1	0.00201996	1.14348e-07				0.00202217	1.14474e-07	8.46513	0.0566091
TP30	TP30_8_1.ais	8	1	3677256000	2126001	7429571	4301.73	0.00202041	8.57568e-08				0.00202263	8.5851e-08	8.69228	0.0424452
TP30	TP30_9_1.ais	9	1	3664630000	1535323	7405161	3211.6	0.00202071	1.25311e-07				0.00202293	1.25449e-07	8.84206	0.0620133
TP30	TP30_10_1.ais	10	1	3660925000	1984098	7398545	3981.31	0.00202095	1.12643e-07				0.00202317	1.12766e-07	8.96088	0.0557375
R33	R33_JW549@21.ais	JW549	21	3656262000	2557477	7362687	5241.88	0.00201372	9.56211e-08	4.2487	0.0476866	0.998706
R33	R33_JW549@22.ais	JW549	22	3641420000	2185683	7336500	4623.76	0.00201474	9.9697e-08	4.75534	0.0497192	0.99921

## Sheet: Hf
	Lu-Hf Parameters (Bouvier et al., 2008)			Depleted Mantle Parameters					CHUR today
1.867e-11	Lu 176 decay constant			0.03976	176Lu/177Hf				176Hf/177Hf	0.282785
0.0336	176Lu/177Hf CHUR present day			0.283238	176Hf/177Hf				176Lu/177Hf	0.0336
0.282785	176Hf/177Hf CHUR present day								decay	1.867e-11
Cascades zircon crystals @ ~90 Ma																	εHf		εHf
													at age in column F		Time	Time (Ga)	DM	DM	CHUR	CHUR
MUN ID number	MIT number	Today	Age (Ma)	Sample	Age (a)	176Lu/177Hf	2SE	176Hf/177Hf	2SE	CHUR at age m	Sample at age m	εHf today	εHf @ 90 Ma		0	0	0.283238	16.0192	0.282785	0
13jl24a05	PX10-236 zrn 10	0	90.04	0.09004	9004000	0.000869398	2.295e-05	0.283024	2.13505e-05	0.282779	0.283024	8.46782	8.66258		100	0.1	0.283164	15.6156	0.282722	0
13jl24a06	PX10-236 zrn 9	0	90.04	0.09004	9004000	0.000708701	2.6112e-05	0.283011	1.77887e-05	0.282779	0.283011	7.98675	8.18245		200	0.2	0.283089	15.2111	0.282659	0
13jl24a07	PX10-236 zrn 8	0	90.04	0.09004	9004000	0.000796011	3.52655e-05	0.283023	2.13564e-05	0.282779	0.283023	8.43264	8.62784		300	0.3	0.283015	14.8056	0.282596	0
13jl24a08	PX10-236 zrn 7	0	90.04	0.09004	9004000	0.000624958	3.60361e-05	0.283019	2.3222e-05	0.282779	0.283019	8.26151	8.45772		400	0.4	0.28294	14.3992	0.282533	0
13jl24a09	PX10-236 zrn 7	0	90.04	0.09004	9004000	0.00053976	8.96497e-06	0.283031	2.38786e-05	0.282779	0.28303	8.68154	8.87826		500	0.5	0.282865	13.9918	0.28247	0
13jl24a10	PX10-236 zrn 7	0	90.04	0.09004	9004000	0.000764361	6.60426e-05	0.283035	2.31183e-05	0.282779	0.283035	8.84147	9.03686		600	0.6	0.28279	13.5835	0.282406	0
13jl24a11	PX10-236 zrn 6	0	90.04	0.09004	9004000	0.000793128	4.81939e-05	0.283017	2.40284e-05	0.282779	0.283017	8.1932	8.3884		700	0.7	0.282715	13.1743	0.282343	0
13jl24a12	PX10-236 zrn 5	0	90.04	0.09004	9004000	0.000887492	5.29802e-05	0.283035	2.4233e-05	0.282779	0.283034	8.82467	9.01933		800	0.8	0.28264	12.7641	0.282279	0
13jl24a14	PX10-236 zrn 4	0	90.04	0.09004	9004000	0.00112993	2.51867e-05	0.283048	1.96235e-05	0.282779	0.283048	9.29671	9.48994		900	0.9	0.282564	12.3529	0.282216	0
13jl24a15	PX10-236 zrn 4	0	90.04	0.09004	9004000	0.00128918	2.8404e-05	0.28303	2.75176e-05	0.282779	0.28303	8.67369	8.86596		1000	1	0.282489	11.9408	0.282152	0
13jl24a16	WCG zrn 1	0	87.474	0.087474	8.7474e+06	0.000469023	1.6534e-05	0.283029	2.14561e-05	0.28278	0.283029	8.61605	8.80757		1100	1.1	0.282413	11.5278	0.282088	0
13jl24a17	WCG zrn 2	0	87.474	0.087474	8.7474e+06	0.000711819	4.55453e-05	0.283032	2.24535e-05	0.28278	0.283032	8.72586	8.91598		1200	1.2	0.282337	11.1137	0.282024	0
13jl24a18	WCG zrn 3	0	87.474	0.087474	8.7474e+06	0.000772475	4.88015e-05	0.282971	2.00777e-05	0.28278	0.282971	6.57192	6.76165		1300	1.3	0.282261	10.6988	0.28196	0
13jl24a19	WCG zrn 4	0	87.474	0.087474	8.7474e+06	0.000859372	5.282e-05	0.283008	1.38292e-05	0.28278	0.283008	7.88501	8.07427		1400	1.4	0.282185	10.2828	0.281895	0
13jl24a20	WCG zrn 5	0	87.474	0.087474	8.7474e+06	0.000340543	3.40318e-05	0.283007	1.28818e-05	0.28278	0.283007	7.83638	8.02863		1500	1.5	0.282109	9.86588	0.281831	0
13jl24a21	WCG zrn 6	0	87.474	0.087474	8.7474e+06	0.000472196	4.7484e-05	0.282996	2.5002e-05	0.28278	0.282996	7.45606	7.64754		1600	1.6	0.282032	9.44799	0.281766	0
13jl24a24	MAF zrn 1	0	91.755	0.091755	9.1755e+06	0.00119851	5.31448e-05	0.283018	4.2273e-05	0.282779	0.283018	8.2343	8.43077		1700	1.7	0.281956	9.02913	0.281701	0
13jl24a25	MAF zrn 2, pt 1	0	91.755	0.091755	9.1755e+06	0.00130532	8.57917e-05	0.282987	2.30764e-05	0.282779	0.282987	7.1347	7.3305		1800	1.8	0.281879	8.6093	0.281637	0
13jl24a26	MAF zrn 2, pt 2	0	91.755	0.091755	9.1755e+06	0.00140282	0.000114043	0.283052	3.28618e-05	0.282779	0.283052	9.44971	9.64497		1900	1.9	0.281802	8.18848	0.281572	0
13jl24a27	MAF zrn 3	0	91.755	0.091755	9.1755e+06	0.00181846	6.98743e-06	0.283032	2.88732e-05	0.282779	0.283032	8.74139	8.93411		2000	2	0.281725	7.76668	0.281507	0
13jl24a28	MAF zrn 4	0	91.755	0.091755	9.1755e+06	0.00137864	0.000108626	0.283026	2.64905e-05	0.282779	0.283026	8.53973	8.73512		2100	2.1	0.281648	7.3439	0.281441	0
13jl24a29	PX10-221 zrn 1	0	87.872	0.087872	8787200	0.000660229	6.24348e-05	0.283015	2.29295e-05	0.282779	0.283015	8.14722	8.3385		2200	2.2	0.281571	6.92013	0.281376	0
13jl24a30	PX10-221 zrn 2	0	87.872	0.087872	8787200	0.000482534	2.44592e-05	0.282977	2.14389e-05	0.282779	0.282977	6.80239	6.99467		2300	2.3	0.281493	6.49538	0.281311	0
13jl24a31	PX10-221 zrn 3	0	87.872	0.087872	8787200	0.000523328	4.92504e-05	0.283	2.42267e-05	0.282779	0.283	7.61466	7.80673		2400	2.4	0.281416	6.06963	0.281245	0
13jl24a33	PX10-221 zrn 4	0	87.872	0.087872	8787200	0.000510074	7.74571e-06	0.28302	2.50133e-05	0.282779	0.28302	8.31419	8.50634		2500	2.5	0.281338	5.64289	0.28118	0
13jl24a34	PX10-221 zrn 5	0	87.872	0.087872	8787200	0.000785083	7.04229e-05	0.282966	3.49713e-05	0.282779	0.282966	6.39489	6.58541		2600	2.6	0.28126	5.21515	0.281114	0
13jl24a35	PX10-221 zrn 6	0	87.872	0.087872	8787200	0.000553998	5.17559e-05	0.282997	4.28214e-05	0.282779	0.282996	7.48111	7.673		2700	2.7	0.281182	4.78641	0.281048	0
13jl24a36	PX10-236 zrn 1	0	90.04	0.09004	9004000	0.000559517	5.16379e-06	0.283028	2.91226e-05	0.282779	0.283028	8.58312	8.77972		2800	2.8	0.281104	4.35666	0.280982	0
13jl24a37	PX10-236 zrn 2	0	90.04	0.09004	9004000	0.000624361	1.28078e-05	0.283048	2.29244e-05	0.282779	0.283048	9.30948	9.50571		2900	2.9	0.281026	3.92591	0.280916	0
13jl24a38	PX10-236 zrn 3	0	90.04	0.09004	9004000	0.000886243	6.74127e-05	0.283019	1.97379e-05	0.282779	0.283019	8.28763	8.48229		3000	3	0.280947	3.49415	0.280849	0
														3100	3.1	0.280869	3.06139	0.280783	0
														3200	3.2	0.28079	2.6276	0.280716	0
														3300	3.3	0.280711	2.1928	0.28065	0
														3400	3.4	0.280632	1.75698	0.280583	0
														3500	3.5	0.280553	1.32014	0.280516	0
														3600	3.6	0.280474	0.882274	0.280449	0
														3700	3.7	0.280394	0.443378	0.280382	0
														3800	3.8	0.280315	0.00345166	0.280315	0
														3900	3.9	0.280247	0	0.280247	0
														4000	4	0.28018	0	0.28018	0
														4100	4.1	0.280112	0	0.280112	0
														4200	4.2	0.280044	0	0.280044	0
														4300	4.3	0.279976	0	0.279976	0
														4400	4.4	0.279908	0	0.279908	0
														4500	4.5	0.27984	0	0.27984	0
														4560	4.56	0.279799	0	0.279799	0
